# Supplementary material for: Molecular-level degradation pathways of black phosphorus revealed by mass spectrometry fingerprinting
Source: Royal Society of Chemistry journal article supplement (doi:10.1039/d2sc06297f), 2023-01-01
Supplement: d2sc06297f1.pdf [file d2sc06297f1.pdf]

1 SUPPLEMENTARY INFORMATION

2 for

3 **Molecular-level degradation pathways of black phosphorus**  
4 **revealed by mass spectrometry fingerprinting**

5 Xiu Huang,<sup>a,b</sup> Yong Li,<sup>a</sup> Guangbo Qu,<sup>a</sup> Xue-Feng Yu,<sup>c</sup> Dong Cao,<sup>a</sup> Qian Liu,<sup>\*a,d,e</sup> Guibin  
6 Jiang<sup>a,e</sup>

7 <sup>a</sup> *State Key Laboratory of Environmental Chemistry and Ecotoxicology, Research Center for Eco-*  
8 *Environmental Sciences, Chinese Academy of Sciences, Beijing 100085, China*

9 <sup>b</sup> *West China School of Public Health and West China Fourth Hospital, Sichuan University,*  
10 *Sichuan 610065, China*

11 <sup>c</sup> *Materials Interfaces Center, Shenzhen Institutes of Advanced Technology, Chinese Academy of*  
12 *Sciences, Shenzhen 518055, China*

13 <sup>d</sup> *Institute of Environment and Health, Jiangnan University, Wuhan 430056, China*

14 <sup>e</sup> *College of Resources and Environment, University of Chinese Academy of Sciences, Beijing 100190,*  
15 *China*

16 Email: [qianliu@rcees.ac.cn](mailto:qianliu@rcees.ac.cn)

17  
18 **Contents**

19 1. Supplementary Tables

20 2. Supplementary Figures

21

22 **1. Supplementary Tables**23 **Table S1. Analytical figures of merit of BP materials by dual-ion-mode LDI-TOF MS.**

| Material        | Ion mode | $m/z^a$ | LOD<br>(pg/mL) <sup>b</sup> | Shot-to-shot<br>RSD ( $n = 20$ ) <sup>c</sup> | Sample-to-sample<br>RSD ( $n = 15$ ) <sup>d</sup> | Linear range<br>( $\mu\text{g/mL}$ ) | Calibration equation | $R^2$ |
|-----------------|----------|---------|-----------------------------|-----------------------------------------------|---------------------------------------------------|--------------------------------------|----------------------|-------|
| CeBP            | Positive | 216.8   | $1.0 \times 10^2$           | 10.4%                                         | 14.5%                                             | 0.2 - 100                            | $y = 85.0x + 79.6$   | 0.998 |
|                 | Negative | 650.4   | $1.0 \times 10^3$           | 16.8%                                         | 20.2%                                             | 0.08 - 100                           | $y = 155.0x + 266.7$ | 0.998 |
| $\mu\text{mBP}$ | Positive | 216.8   | $1.6 \times 10^2$           | 12.7%                                         | 17.0%                                             | 0.2 - 100                            | $y = 215.0x + 815.6$ | 0.994 |
|                 | Negative | 154.8   | $1.6 \times 10^3$           | 15.5%                                         | 22.0%                                             | 0.08 - 100                           | $y = 226.9x + 631.5$ | 0.997 |
| QDBP            | Positive | 216.8   | 0.8                         | 14.2%                                         | 23.9%                                             | 0.2 - 20                             | $y = 36.1x + 67.9$   | 0.991 |
|                 | Negative | 154.8   | 8                           | 17.6%                                         | 23.3%                                             | 0.2 - 20                             | $y = 85.0x + 20.8$   | 0.998 |

24 <sup>a</sup> The  $m/z$  values of the MS peaks used in quantitative analysis.25 <sup>b</sup> The LODs were measured based at the cascading decreased sample concentrations with a signal-to-noise ratio greater than 3.26 <sup>c</sup> The shot-to-shot RSDs were measured based on 20 shots at different locations on the MALDI target ( $n = 20$ ).27 <sup>d</sup> The sample-to-sample RSDs were measured based on 15 samples in different batches ( $n = 15$ ).

28 **Table S2. Peaks detected and their intensities of BP by dual-ion-mode LDI-FTICR MS in**  
 29 **Figure 1b-c.**

| Negative ion mode                                      |                    | Positive ion mode            |                    |
|--------------------------------------------------------|--------------------|------------------------------|--------------------|
| Peak                                                   | Peak intensity     | Peak                         | Peak intensity     |
| P <sub>13</sub> <sup>-</sup>                           | $3.75 \times 10^7$ | P <sub>7</sub> <sup>+</sup>  | $4.90 \times 10^8$ |
| P <sub>15</sub> <sup>-</sup>                           | $2.28 \times 10^7$ | P <sub>8</sub> <sup>+</sup>  | $1.20 \times 10^6$ |
| P <sub>17</sub> <sup>-</sup>                           | $7.41 \times 10^7$ | P <sub>9</sub> <sup>+</sup>  | $4.76 \times 10^7$ |
| P <sub>21</sub> <sup>-</sup>                           | $2.44 \times 10^7$ | P <sub>10</sub> <sup>+</sup> | $3.17 \times 10^7$ |
| P <sub>23</sub> <sup>-</sup>                           | $4.89 \times 10^7$ | P <sub>11</sub> <sup>+</sup> | $1.94 \times 10^8$ |
| [P <sub>18</sub> H <sub>2</sub> +Ce+K-2H] <sup>-</sup> | $5.14 \times 10^9$ | P <sub>12</sub> <sup>+</sup> | $2.88 \times 10^7$ |
| P <sub>25</sub> <sup>-</sup>                           | $5.47 \times 10^7$ | P <sub>13</sub> <sup>+</sup> | $6.42 \times 10^8$ |
| P <sub>27</sub> <sup>-</sup>                           | $4.63 \times 10^7$ | P <sub>14</sub> <sup>+</sup> | $7.76 \times 10^7$ |
| P <sub>29</sub> <sup>-</sup>                           | $1.05 \times 10^8$ | P <sub>15</sub> <sup>+</sup> | $7.26 \times 10^8$ |
| P <sub>31</sub> <sup>-</sup>                           | $2.52 \times 10^7$ | P <sub>16</sub> <sup>+</sup> | $1.02 \times 10^8$ |
|                                                        |                    | P <sub>17</sub> <sup>+</sup> | $5.08 \times 10^8$ |
|                                                        |                    | P <sub>18</sub> <sup>+</sup> | $7.94 \times 10^7$ |
|                                                        |                    | P <sub>19</sub> <sup>+</sup> | $5.87 \times 10^8$ |
|                                                        |                    | P <sub>20</sub> <sup>+</sup> | $4.20 \times 10^7$ |
|                                                        |                    | P <sub>21</sub> <sup>+</sup> | $6.80 \times 10^8$ |
|                                                        |                    | P <sub>22</sub> <sup>+</sup> | $2.23 \times 10^7$ |
|                                                        |                    | P <sub>23</sub> <sup>+</sup> | $7.13 \times 10^8$ |
|                                                        |                    | P <sub>24</sub> <sup>+</sup> | $3.62 \times 10^7$ |
|                                                        |                    | P <sub>25</sub> <sup>+</sup> | $6.21 \times 10^8$ |

30

31 **Table S3. Peaks detected and their intensities of different BP materials by dual-ion-mode LDI-TOF MS in Figure 1d-m.**

| Negative ion mode            |           |                                                                    |           |                              |           |                              |           |                                                        |           |
|------------------------------|-----------|--------------------------------------------------------------------|-----------|------------------------------|-----------|------------------------------|-----------|--------------------------------------------------------|-----------|
| BP                           |           | OBP                                                                |           | $\mu$ mBP                    |           | QDBP                         |           | CeBP                                                   |           |
| Peak                         | Intensity | Peak                                                               | Intensity | Peak                         | Intensity | Peak                         | Intensity | Peak                                                   | Intensity |
| P <sub>2</sub> <sup>-</sup>  | 5336      | PO <sub>2</sub> <sup>-</sup>                                       | 463       | P <sub>2</sub> <sup>-</sup>  | 2366      | P <sub>2</sub> <sup>-</sup>  | 440       | P <sub>3</sub> <sup>-</sup>                            | 356       |
| P <sub>3</sub> <sup>-</sup>  | 4132      | P <sub>2</sub> HO <sup>-</sup>                                     | 2741      | P <sub>3</sub> <sup>-</sup>  | 3595      | P <sub>3</sub> <sup>-</sup>  | 494       | P <sub>5</sub> <sup>-</sup>                            | 1825      |
| P <sub>5</sub> <sup>-</sup>  | 16795     | P <sub>5</sub> <sup>-</sup>                                        | 2962      | P <sub>5</sub> <sup>-</sup>  | 29988     | P <sub>4</sub> <sup>-</sup>  | 91        | P <sub>7</sub> <sup>-</sup>                            | 1507      |
| P <sub>6</sub> <sup>-</sup>  | 3062      | P <sub>7</sub> <sup>-</sup>                                        | 2616      | P <sub>6</sub> <sup>-</sup>  | 2245      | P <sub>5</sub> <sup>-</sup>  | 3104      | P <sub>8</sub> <sup>-</sup>                            | 700       |
| P <sub>7</sub> <sup>-</sup>  | 12043     | P <sub>8</sub> <sup>-</sup>                                        | 2777      | P <sub>7</sub> <sup>-</sup>  | 19882     | P <sub>6</sub> <sup>-</sup>  | 440       | P <sub>9</sub> <sup>-</sup>                            | 1436      |
| P <sub>8</sub> <sup>-</sup>  | 7799      | P <sub>9</sub> <sup>-</sup>                                        | 3668      | P <sub>8</sub> <sup>-</sup>  | 9298      | P <sub>7</sub> <sup>-</sup>  | 1129      | P <sub>10</sub> <sup>-</sup>                           | 693       |
| P <sub>9</sub> <sup>-</sup>  | 10711     | P <sub>10</sub> <sup>-</sup>                                       | 3793      | P <sub>9</sub> <sup>-</sup>  | 17341     | P <sub>8</sub> <sup>-</sup>  | 275       | P <sub>11</sub> <sup>-</sup>                           | 903       |
| P <sub>10</sub> <sup>-</sup> | 6917      | P <sub>11</sub> <sup>-</sup>                                       | 3629      | P <sub>10</sub> <sup>-</sup> | 7977      | P <sub>9</sub> <sup>-</sup>  | 909       | P <sub>12</sub> <sup>-</sup>                           | 251       |
| P <sub>11</sub> <sup>-</sup> | 6126      | P <sub>11</sub> O <sub>2</sub> <sup>-</sup>                        | 2939      | P <sub>11</sub> <sup>-</sup> | 7484      | P <sub>10</sub> <sup>-</sup> | 237       | P <sub>13</sub> <sup>-</sup>                           | 2348      |
| P <sub>12</sub> <sup>-</sup> | 2558      | P <sub>12</sub> O <sub>2</sub> <sup>-</sup>                        | 6863      | P <sub>12</sub> <sup>-</sup> | 1743      | P <sub>11</sub> <sup>-</sup> | 278       | P <sub>15</sub> <sup>-</sup>                           | 1618      |
| P <sub>13</sub> <sup>-</sup> | 12966     | P <sub>14</sub> O <sub>2</sub> <sup>-</sup>                        | 7220      | P <sub>13</sub> <sup>-</sup> | 23312     | P <sub>12</sub> <sup>-</sup> | 172       | P <sub>17</sub> <sup>-</sup>                           | 2785      |
| P <sub>14</sub> <sup>-</sup> | 1410      | P <sub>15</sub> O <sub>2</sub> <sup>-</sup>                        | 3297      | P <sub>14</sub> <sup>-</sup> | 1245      | P <sub>13</sub> <sup>-</sup> | 981       | P <sub>19</sub> <sup>-</sup>                           | 460       |
| P <sub>15</sub> <sup>-</sup> | 8832      | P <sub>16</sub> O <sub>2</sub> <sup>-</sup>                        | 10850     | P <sub>15</sub> <sup>-</sup> | 16629     | P <sub>14</sub> <sup>-</sup> | 110       | P <sub>21</sub> <sup>-</sup>                           | 2505      |
| P <sub>16</sub> <sup>-</sup> | 3650      | P <sub>18</sub> O <sub>2</sub> <sup>-</sup>                        | 3668      | P <sub>16</sub> <sup>-</sup> | 1928      | P <sub>15</sub> <sup>-</sup> | 382       | P <sub>23</sub> <sup>-</sup>                           | 773       |
| P <sub>17</sub> <sup>-</sup> | 10455     | [P <sub>17</sub> H <sub>2</sub> O <sub>2</sub> +K-2H] <sup>-</sup> | 6451      | P <sub>17</sub> <sup>-</sup> | 22718     | P <sub>17</sub> <sup>-</sup> | 928       | [P <sub>15</sub> H <sub>2</sub> +Na-2H] <sup>-</sup>   | 3555      |
| P <sub>18</sub> <sup>-</sup> | 833       | P <sub>19</sub> HO <sub>2</sub> <sup>-</sup>                       | 1073      | P <sub>18</sub> <sup>-</sup> | 219       | P <sub>19</sub> <sup>-</sup> | 42        | [P <sub>19</sub> H <sub>2</sub> O] <sup>-</sup>        | 5101      |
| P <sub>19</sub> <sup>-</sup> | 2332      | P <sub>20</sub> O <sub>2</sub> <sup>-</sup>                        | 2094      | P <sub>19</sub> <sup>-</sup> | 2467      | P <sub>20</sub> <sup>-</sup> | 22        | [P <sub>18</sub> H <sub>2</sub> +Ce+K-2H] <sup>-</sup> | 18973     |
| P <sub>20</sub> <sup>-</sup> | 209       | P <sub>20</sub> O <sub>3</sub> <sup>-</sup>                        | 566       | P <sub>20</sub> <sup>-</sup> | 310       | P <sub>22</sub> <sup>-</sup> | 22        | [P <sub>4</sub> H <sub>4</sub> +Na-2H] <sup>-</sup>    | 4791      |

|                              |      |                                              |      |                                                     |      |                                                     |      |
|------------------------------|------|----------------------------------------------|------|-----------------------------------------------------|------|-----------------------------------------------------|------|
| P <sub>21</sub> <sup>-</sup> | 1812 | P <sub>21</sub> HO <sub>2</sub> <sup>-</sup> | 618  | P <sub>21</sub> <sup>-</sup>                        | 902  | P <sub>23</sub> <sup>-</sup>                        | 94   |
| P <sub>22</sub> <sup>-</sup> | 153  | P <sub>22</sub> O <sub>2</sub> <sup>-</sup>  | 5689 | P <sub>23</sub> <sup>-</sup>                        | 3841 | P <sub>24</sub> <sup>-</sup>                        | 23   |
| P <sub>23</sub> <sup>-</sup> | 3579 | P <sub>22</sub> O <sub>3</sub> <sup>-</sup>  | 395  | P <sub>25</sub> <sup>-</sup>                        | 861  | [P <sub>2</sub> H <sub>3</sub> +K-2H] <sup>-</sup>  | 1601 |
| P <sub>24</sub> <sup>-</sup> | 222  | P <sub>23</sub> HO <sub>2</sub> <sup>-</sup> | 879  | P <sub>27</sub> <sup>-</sup>                        | 313  | [P <sub>4</sub> H <sub>2</sub> +Na-2H] <sup>-</sup> | 1103 |
| P <sub>25</sub> <sup>-</sup> | 1691 | P <sub>24</sub> O <sub>2</sub> <sup>-</sup>  | 1815 | P <sub>29</sub> <sup>-</sup>                        | 1123 | [P <sub>4</sub> H <sub>4</sub> +K-2H] <sup>-</sup>  | 313  |
| P <sub>27</sub> <sup>-</sup> | 781  | P <sub>28</sub> HO <sub>2</sub> <sup>-</sup> | 1465 | [P <sub>2</sub> H <sub>3</sub> +K-2H] <sup>-</sup>  | 5868 | [P <sub>6</sub> H <sub>4</sub> +K-2H] <sup>-</sup>  | 482  |
| P <sub>29</sub> <sup>-</sup> | 1326 | P <sub>26</sub> HO <sub>2</sub> <sup>-</sup> | 828  | [P <sub>4</sub> H <sub>2</sub> +Na-2H] <sup>-</sup> | 2961 |                                                     |      |
| P <sub>31</sub> <sup>-</sup> | 236  |                                              |      | [P <sub>10</sub> H <sub>3</sub> +K-2H] <sup>-</sup> | 1335 |                                                     |      |
|                              |      |                                              |      | [P <sub>12</sub> H <sub>3</sub> +K-2H] <sup>-</sup> | 941  |                                                     |      |
|                              |      |                                              |      | [P <sub>14</sub> H <sub>3</sub> +K-2H] <sup>-</sup> | 1383 |                                                     |      |

---

Positive ion mode

---

|                              |       |                                    |       |                              |       |                              |      |                              |       |
|------------------------------|-------|------------------------------------|-------|------------------------------|-------|------------------------------|------|------------------------------|-------|
| P <sub>3</sub> <sup>+</sup>  | 22762 | P <sub>3</sub> <sup>+</sup>        | 9423  | P <sub>3</sub> <sup>+</sup>  | 6316  | P <sub>3</sub> <sup>+</sup>  | 92   | P <sub>3</sub> <sup>+</sup>  | 935   |
| P <sub>4</sub> <sup>+</sup>  | 26459 | P <sub>3</sub> O <sup>+</sup>      | 7904  | P <sub>4</sub> <sup>+</sup>  | 8897  | P <sub>4</sub> <sup>+</sup>  | 225  | P <sub>4</sub> <sup>+</sup>  | 1121  |
| P <sub>5</sub> <sup>+</sup>  | 27553 | P <sub>5</sub> <sup>+</sup>        | 12554 | P <sub>5</sub> <sup>+</sup>  | 12247 | P <sub>5</sub> <sup>+</sup>  | 186  | P <sub>5</sub> <sup>+</sup>  | 3119  |
| P <sub>6</sub> <sup>+</sup>  | 18930 | P <sub>6</sub> <sup>+</sup>        | 8600  | P <sub>6</sub> <sup>+</sup>  | 3601  | P <sub>7</sub> <sup>+</sup>  | 1145 | P <sub>6</sub> <sup>+</sup>  | 491   |
| P <sub>7</sub> <sup>+</sup>  | 38262 | P <sub>7</sub> <sup>+</sup>        | 18102 | P <sub>7</sub> <sup>+</sup>  | 26389 | P <sub>8</sub> <sup>+</sup>  | 74   | P <sub>7</sub> <sup>+</sup>  | 17007 |
| P <sub>8</sub> <sup>+</sup>  | 19705 | P <sub>7</sub> O <sup>+</sup>      | 5549  | P <sub>8</sub> <sup>+</sup>  | 3212  | P <sub>9</sub> <sup>+</sup>  | 76   | P <sub>8</sub> <sup>+</sup>  | 830   |
| P <sub>9</sub> <sup>+</sup>  | 22199 | P <sub>8</sub> <sup>+</sup>        | 8739  | P <sub>9</sub> <sup>+</sup>  | 6486  | P <sub>11</sub> <sup>+</sup> | 46   | P <sub>9</sub> <sup>+</sup>  | 2119  |
| P <sub>10</sub> <sup>+</sup> | 15012 | P <sub>9</sub> <sup>+</sup>        | 9633  | P <sub>10</sub> <sup>+</sup> | 2015  | P <sub>13</sub> <sup>+</sup> | 104  | P <sub>10</sub> <sup>+</sup> | 585   |
| P <sub>11</sub> <sup>+</sup> | 19142 | P <sub>10</sub> <sup>+</sup>       | 6739  | P <sub>11</sub> <sup>+</sup> | 4513  | P <sub>15</sub> <sup>+</sup> | 32   | P <sub>11</sub> <sup>+</sup> | 1392  |
| P <sub>12</sub> <sup>+</sup> | 4535  | [P <sub>10</sub> +Na] <sup>+</sup> | 5159  | P <sub>12</sub> <sup>+</sup> | 379   | Na                           | 183  | P <sub>12</sub> <sup>+</sup> | 129   |

|                                             |       |                                                            |       |                                                           |       |                                                           |      |                                                  |       |
|---------------------------------------------|-------|------------------------------------------------------------|-------|-----------------------------------------------------------|-------|-----------------------------------------------------------|------|--------------------------------------------------|-------|
| P <sub>13</sub> <sup>+</sup>                | 21498 | P <sub>11</sub> <sup>+</sup>                               | 10981 | P <sub>13</sub> <sup>+</sup>                              | 5312  | K                                                         | 980  | P <sub>13</sub> <sup>+</sup>                     | 1975  |
| P <sub>14</sub> <sup>+</sup>                | 5996  | P <sub>11</sub> O <sup>+</sup>                             | 3184  | P <sub>14</sub> <sup>+</sup>                              | 402   | [P <sub>2</sub> H+Na] <sup>+</sup>                        | 131  | P <sub>14</sub> <sup>+</sup>                     | 303   |
| P <sub>15</sub> <sup>+</sup>                | 14722 | P <sub>12</sub> <sup>+</sup>                               | 3152  | P <sub>15</sub> <sup>+</sup>                              | 1913  | [PH <sub>2</sub> N <sub>2</sub> +K] <sup>+</sup>          | 2629 | P <sub>15</sub> <sup>+</sup>                     | 1141  |
| P <sub>15</sub> O <sub>2</sub> <sup>+</sup> | 2839  | P <sub>13</sub> <sup>+</sup>                               | 8985  | P <sub>16</sub> <sup>+</sup>                              | 247   | [P <sub>2</sub> N <sub>2</sub> +Na] <sup>+</sup>          | 4101 | P <sub>17</sub> <sup>+</sup>                     | 407   |
| P <sub>17</sub> <sup>+</sup>                | 8706  | P <sub>14</sub> <sup>+</sup>                               | 4289  | P <sub>17</sub> <sup>+</sup>                              | 779   | P <sub>3</sub> H <sub>2</sub> O <sub>2</sub> <sup>+</sup> | 2035 | P <sub>19</sub> <sup>+</sup>                     | 793   |
| P <sub>18</sub> <sup>+</sup>                | 1162  | P <sub>15</sub> <sup>+</sup>                               | 7632  | P <sub>19</sub> <sup>+</sup>                              | 1258  |                                                           |      | [P <sub>16</sub> +Ce] <sup>+</sup>               | 4314  |
| P <sub>19</sub> <sup>+</sup>                | 10978 | P <sub>16</sub> <sup>+</sup>                               | 2398  | P <sub>21</sub> <sup>+</sup>                              | 1316  |                                                           |      | P <sub>21</sub> <sup>+</sup>                     | 706   |
| P <sub>20</sub> <sup>+</sup>                | 1487  | P <sub>17</sub> <sup>+</sup>                               | 5971  | P <sub>23</sub> <sup>+</sup>                              | 1947  |                                                           |      | P <sub>23</sub> <sup>+</sup>                     | 1118  |
| P <sub>21</sub> <sup>+</sup>                | 11256 | P <sub>18</sub> <sup>+</sup>                               | 1028  | P <sub>25</sub> <sup>+</sup>                              | 2389  |                                                           |      | P <sub>25</sub> <sup>+</sup>                     | 1128  |
| P <sub>23</sub> <sup>+</sup>                | 10889 | P <sub>19</sub> <sup>+</sup>                               | 6906  | Na                                                        | 1117  |                                                           |      | Na                                               | 442   |
| P <sub>25</sub> <sup>+</sup>                | 9676  | P <sub>20</sub> <sup>+</sup>                               | 455   | K                                                         | 5314  |                                                           |      | K                                                | 2215  |
|                                             |       | P <sub>21</sub> <sup>+</sup>                               | 6977  | [P <sub>2</sub> H+Na] <sup>+</sup>                        | 3956  |                                                           |      | [P <sub>2</sub> H+Na] <sup>+</sup>               | 2135  |
|                                             |       | P <sub>23</sub> <sup>+</sup>                               | 6155  | [PH <sub>2</sub> N <sub>2</sub> +K] <sup>+</sup>          | 30749 |                                                           |      | [PH <sub>2</sub> N <sub>2</sub> +K] <sup>+</sup> | 8263  |
|                                             |       | Na                                                         | 8166  | P <sub>3</sub> H <sub>2</sub> O <sub>2</sub> <sup>+</sup> | 15045 |                                                           |      | [P <sub>2</sub> N <sub>2</sub> +Na] <sup>+</sup> | 23552 |
|                                             |       | K                                                          | 22659 |                                                           |       |                                                           |      |                                                  |       |
|                                             |       | [P <sub>2</sub> H+Na] <sup>+</sup>                         | 1902  |                                                           |       |                                                           |      |                                                  |       |
|                                             |       | P <sub>12</sub> H <sub>2</sub> O <sub>3</sub> <sup>+</sup> | 4212  |                                                           |       |                                                           |      |                                                  |       |
|                                             |       | P <sub>13</sub> H <sub>3</sub> O <sub>3</sub> <sup>+</sup> | 2337  |                                                           |       |                                                           |      |                                                  |       |
|                                             |       | P <sub>14</sub> H <sub>3</sub> O <sub>3</sub> <sup>+</sup> | 4401  |                                                           |       |                                                           |      |                                                  |       |
|                                             |       | P <sub>15</sub> H <sub>3</sub> O <sub>3</sub> <sup>+</sup> | 1063  |                                                           |       |                                                           |      |                                                  |       |
|                                             |       | P <sub>17</sub> H <sub>2</sub> O <sub>3</sub> <sup>+</sup> | 638   |                                                           |       |                                                           |      |                                                  |       |

33 **Table S4. The intensities, repeatability, and mass errors of typical peaks of BP during degradation in Figure 2a and Table S2.**

| Peak                                                            | 0 d  | 2 d  | 4 d  | 8 d   | 12 d  | 20 d  | Sample-to-sample<br>RSD ( $n = 15$ ) <sup>a</sup> | Measured $m/z$ | Theoretical<br>$m/z$ | Mass error<br>(ppm) |
|-----------------------------------------------------------------|------|------|------|-------|-------|-------|---------------------------------------------------|----------------|----------------------|---------------------|
| [PO <sub>2</sub> +Na] <sup>+</sup>                              | 231  | 652  | 722  | 680   | 1778  | 391   | 5.1%                                              | 85.954         | 85.952               | 17                  |
| P <sub>4</sub> O <sub>2</sub> <sup>+</sup>                      | 0    | 228  | 5968 | 10937 | 11631 | 16052 | 20.4%                                             | 155.888        | 155.884              | 21                  |
| [P <sub>7</sub> O <sub>2</sub> +Na] <sup>+</sup>                | 286  | 501  | 990  | 2051  | 829   | 455   | 8.9%                                              | 271.793        | 271.795              | -8                  |
| [P <sub>8</sub> O <sub>2</sub> +2Na] <sup>+</sup>               | 1126 | 454  | 0    | 1003  | 1526  | 0     | 22.4%                                             | 325.765        | 325.759              | 19                  |
| P <sub>23</sub> O <sub>2</sub> <sup>+</sup>                     | 80   | 225  | 183  | 174   | 186   | 0     | 11.8%                                             | 744.379        | 744.386              | -8                  |
| [PH <sub>2</sub> O <sub>2</sub> +Na] <sup>+</sup>               | 202  | 554  | 296  | 1274  | 888   | 592   | 4.0%                                              | 87.967         | 87.968               | -14                 |
| [PH <sub>2</sub> O <sub>3</sub> +Na] <sup>+</sup>               | 391  | 188  | 2225 | 2714  | 8998  | 816   | 14.7%                                             | 117.937        | 117.934              | 21                  |
| [P <sub>2</sub> HO <sub>2</sub> +Na] <sup>+</sup>               | 121  | 261  | 378  | 422   | 749   | 679   | 4.9%                                              | 103.965        | 103.963              | 17                  |
| P <sub>2</sub> H <sub>2</sub> O <sub>3</sub> <sup>+</sup>       | 173  | 388  | 0    | 395   | 374   | 400   | 2.8%                                              | 111.945        | 111.947              | -18                 |
| [P <sub>5</sub> H <sub>2</sub> O <sub>3</sub> +Na] <sup>+</sup> | 384  | 631  | 598  | 1086  | 788   | 0     | 15.1%                                             | 227.850        | 227.858              | -37                 |
| [P <sub>6</sub> HO <sub>2</sub> +Na] <sup>+</sup>               | 828  | 1057 | 1377 | 5571  | 1864  | 788   | 28.4%                                             | 241.834        | 241.829              | 20                  |
| [P <sub>7</sub> H <sub>2</sub> O <sub>2</sub> +Na] <sup>+</sup> | 344  | 1110 | 1122 | 2483  | 1407  | 555   | 13.8%                                             | 273.813        | 273.811              | -6                  |
| [P <sub>3</sub> H <sub>4</sub> O <sub>4</sub> +K] <sup>+</sup>  | 0    | 228  | 5968 | 10937 | 11631 | 16052 | 7.0%                                              | 199.907        | 199.904              | 18                  |
| P <sub>8</sub> H <sub>2</sub> O <sub>3</sub> <sup>+</sup>       | 613  | 693  | 955  | 1294  | 913   | 0     | 7.8%                                              | 297.793        | 297.790              | 12                  |
| P <sub>9</sub> HO <sub>2</sub> <sup>+</sup>                     | 3202 | 2259 | 1851 | 1932  | 1770  | 0     | 4.4%                                              | 311.765        | 311.761              | 13                  |
| P <sub>9</sub> HO <sub>3</sub> <sup>+</sup>                     | 616  | 1222 | 1542 | 1794  | 1339  | 0     | 20.8%                                             | 327.763        | 327.756              | 23                  |
| P <sub>10</sub> H <sub>2</sub> O <sub>2</sub> <sup>+</sup>      | 525  | 1189 | 719  | 3178  | 937   | 0     | 22.7%                                             | 343.750        | 343.743              | 22                  |
| P <sub>10</sub> H <sub>2</sub> O <sub>3</sub> <sup>+</sup>      | 549  | 1846 | 1913 | 1746  | 1179  | 0     | 4.6%                                              | 359.750        | 359.737              | 36                  |
| P <sub>11</sub> H <sub>2</sub> O <sub>3</sub> <sup>+</sup>      | 155  | 566  | 710  | 648   | 310   | 0     | 4.7%                                              | 390.700        | 390.711              | -29                 |
| P <sub>12</sub> H <sub>2</sub> O <sub>3</sub> <sup>+</sup>      | 817  | 3018 | 3530 | 4010  | 2387  | 210   | 14.1%                                             | 421.693        | 421.685              | 20                  |
| P <sub>13</sub> H <sub>2</sub> O <sub>3</sub> <sup>+</sup>      | 187  | 842  | 1083 | 1927  | 741   | 0     | 25.8%                                             | 452.653        | 452.659              | -13                 |

|                       |       |       |       |       |       |      |       |         |         |     |
|-----------------------|-------|-------|-------|-------|-------|------|-------|---------|---------|-----|
| $P_9N_4^+$            | 2392  | 1829  | 3797  | 2700  | 2345  | 388  | 7.8%  | 334.770 | 334.776 | -18 |
| $P_{10}N_2^+$         | 3082  | 2113  | 5105  | 3473  | 3115  | 516  | 6.7%  | 337.750 | 337.743 | 20  |
| $P_{18}N_2^+$         | 113   | 607   | 763   | 344   | 370   | 0    | 12.9% | 585.523 | 585.533 | -18 |
| $[P_7N_2+K]^+$        | 932   | 3312  | 1898  | 5565  | 3896  | 553  | 8.1%  | 283.792 | 283.786 | 21  |
| $[P_9N_2+2Na]^+$      | 27238 | 21058 | 34689 | 32070 | 17707 | 4058 | 12.1% | 352.746 | 352.749 | -7  |
| $[P_{14}N_2+Na]^+$    | 795   | 2479  | 2579  | 4138  | 1985  | 180  | 10.0% | 484.625 | 484.628 | -7  |
| $[P_{15}N_2+Na]^+$    | 118   | 305   | 327   | 833   | 0     | 0    | 4.6%  | 515.593 | 515.602 | -17 |
| $[P_{16}N_2+Na]^+$    | 475   | 1739  | 1698  | 3322  | 1313  | 91   | 14.8% | 546.566 | 546.576 | -18 |
| $[P_{18}N_2+Na]^+$    | 251   | 636   | 456   | 1068  | 515   | 0    | 17.1% | 608.513 | 608.523 | -17 |
| $[P_{22}N_2+Na]^+$    | 91    | 238   | 241   | 511   | 358   | 0    | 4.4%  | 732.408 | 732.418 | -13 |
| $[PH_2N_2+Na]^+$      | 481   | 311   | 424   | 366   | 563   | 466  | 14.7% | 83.950  | 83.98   | -59 |
| $[PH_2N_2+K]^+$       | 311   | 1389  | 1832  | 503   | 505   | 390  | 1.6%  | 99.960  | 99.959  | 16  |
| $[PN_2O_2+K]^+$       | 96    | 389   | 499   | 339   | 277   | 1093 | 20.0% | 129.931 | 129.933 | -17 |
| $P_2H_4N_2O_4^+$      | 0     | 361   | 3397  | 7306  | 0     | 0    | 1.4%  | 157.966 | 157.964 | 10  |
| $P_5N_2O_2^+$         | 0     | 843   | 1627  | 0     | 0     | 0    | 8.3%  | 214.868 | 214.864 | 19  |
| $P_5N_4O_4^+$         | 603   | 0     | 1257  | 801   | 622   | 616  | 1.6%  | 274.866 | 274.860 | 21  |
| $[P_5N_2O_2+K]^+$     | 0     | 682   | 797   | 1987  | 742   | 0    | 7.8%  | 253.850 | 253.828 | 88  |
| $[P_6HN_2O_2+K]^+$    | 569   | 823   | 0     | 3057  | 0     | 374  | 11.8% | 285.811 | 269.836 | 5   |
| $[P_6HN_2O_2+Na]^+$   | 297   | 974   | 1480  | 2345  | 1224  | 379  | 11.4% | 269.851 | 285.810 | 58  |
| $[P_7H_2N_2O_2+Na]^+$ | 0     | 0     | 0     | 1644  | 0     | 303  | 11.8% | 301.822 | 301.817 | 16  |
| $[P_7N_2O_2+Na]^+$    | 1879  | 4281  | 4188  | 11785 | 3823  | 1089 | 5.9%  | 299.807 | 299.802 | 18  |
| $[P_8N_2O_2+2Na]^+$   | 9899  | 11781 | 12797 | 10794 | 0     | 933  | 13.3% | 353.766 | 353.765 | 2   |
| $[P_{10}+Na]^+$       | 1898  | 911   | 2552  | 2044  | 1451  | 508  | 15.8% | 332.732 | 332.727 | 16  |
| $[P_9+K]^+$           | 844   | 430   | 0     | 1312  | 742   | 0    | 11.5% | 317.750 | 317.727 | 72  |



|                                   |       |       |       |       |       |      |       |         |         |     |
|-----------------------------------|-------|-------|-------|-------|-------|------|-------|---------|---------|-----|
| [P <sub>7</sub> +K] <sup>+</sup>  | 7576  | 5655  | 8818  | 16318 | 7636  | 1482 | 7.2%  | 255.783 | 255.779 | 14  |
| [P <sub>3</sub> +K] <sup>+</sup>  | 273   | 350   | 1139  | 0     | 517   | 0    | 11.1% | 131.881 | 131.884 | -26 |
| [PH <sub>2</sub> +K] <sup>+</sup> | 240   | 248   | 263   | 435   | 441   | 0    | 3.3%  | 71.953  | 71.953  | 6   |
| [P+K] <sup>+</sup>                | 653   | 799   | 640   | 1199  | 1349  | 643  | 13.1% | 69.950  | 69.937  | 187 |
| P <sub>25</sub> <sup>+</sup>      | 5617  | 4848  | 4522  | 5997  | 4341  | 364  | 5.6%  | 774.338 | 774.343 | -7  |
| P <sub>23</sub> <sup>+</sup>      | 4871  | 5789  | 6023  | 7493  | 4595  | 376  | 5.9%  | 712.393 | 712.396 | -4  |
| P <sub>21</sub> <sup>+</sup>      | 5017  | 5510  | 7044  | 8669  | 3460  | 388  | 10.8% | 650.439 | 650.448 | -14 |
| P <sub>19</sub> <sup>+</sup>      | 4952  | 5097  | 7294  | 8218  | 3415  | 262  | 6.4%  | 588.510 | 588.501 | 15  |
| P <sub>17</sub> <sup>+</sup>      | 3561  | 3368  | 5362  | 5320  | 1121  | 231  | 0.5%  | 526.549 | 526.553 | -8  |
| P <sub>16</sub> <sup>+</sup>      | 1235  | 1136  | 1469  | 1302  | 94    | 0    | 12.8% | 495.581 | 495.580 | 3   |
| P <sub>15</sub> <sup>+</sup>      | 6800  | 6487  | 9033  | 8702  | 1242  | 408  | 3.1%  | 464.603 | 464.606 | -6  |
| P <sub>14</sub> <sup>+</sup>      | 2357  | 1965  | 2486  | 2429  | 170   | 200  | 11.2% | 433.628 | 433.632 | -9  |
| P <sub>13</sub> <sup>+</sup>      | 10474 | 10614 | 12570 | 11095 | 6688  | 776  | 8.9%  | 402.663 | 402.658 | 12  |
| P <sub>12</sub> <sup>+</sup>      | 1517  | 1293  | 1467  | 1063  | 38    | 0    | 15.9% | 371.691 | 371.685 | 17  |
| P <sub>11</sub> <sup>+</sup>      | 9885  | 8059  | 9070  | 7253  | 2049  | 635  | 6.3%  | 340.706 | 340.711 | -14 |
| P <sub>10</sub> <sup>+</sup>      | 6165  | 5313  | 6689  | 4652  | 828   | 461  | 12.6% | 309.729 | 309.737 | -26 |
| P <sub>9</sub> <sup>+</sup>       | 11638 | 10392 | 11638 | 9409  | 3145  | 1080 | 10.7% | 278.767 | 278.763 | 13  |
| P <sub>8</sub> <sup>+</sup>       | 9744  | 7715  | 9628  | 6615  | 1408  | 621  | 5.6%  | 247.791 | 247.790 | 6   |
| P <sub>7</sub> <sup>+</sup>       | 26844 | 35170 | 34658 | 35326 | 7286  | 3543 | 1.0%  | 216.818 | 216.816 | 10  |
| P <sub>6</sub> <sup>+</sup>       | 7284  | 7434  | 9099  | 6852  | 1315  | 813  | 4.1%  | 185.839 | 185.842 | -16 |
| P <sub>5</sub> <sup>+</sup>       | 17632 | 16782 | 18804 | 15707 | 12850 | 0    | 9.2%  | 154.870 | 154.868 | 11  |
| P <sub>4</sub> <sup>+</sup>       | 17311 | 15071 | 16693 | 14553 | 8584  | 1681 | 7.3%  | 123.892 | 123.894 | -20 |
| P <sub>3</sub> <sup>+</sup>       | 8135  | 7987  | 6940  | 5481  | 1269  | 1373 | 4.4%  | 92.922  | 92.920  | 13  |

34 <sup>a</sup> The sample-to-sample RSDs were measured based on 15 samples in different batches ( $n = 15$ ).

35 **Table S5. The repeatability of typical ion ratios detected during BP degradation by LDI-**  
 36 **MS (Fig. 2b-c).**

| Peak ratio                                                                                                           | Sample-to-sample<br>RSD ( $n = 15$ ) <sup>a</sup> | Peak ratio                                                         | Sample-to-sample<br>RSD ( $n = 15$ ) <sup>a</sup> |
|----------------------------------------------------------------------------------------------------------------------|---------------------------------------------------|--------------------------------------------------------------------|---------------------------------------------------|
| [P <sub>7</sub> O <sub>2</sub> +Na]/P <sub>7</sub>                                                                   | 13.1%                                             | P <sub>4</sub> /[P <sub>5</sub> H <sub>2</sub> O <sub>3</sub> +Na] | 10.0%                                             |
| [P <sub>7</sub> H <sub>2</sub> O <sub>2</sub> +Na]/P <sub>7</sub>                                                    | 5.6%                                              | P <sub>7</sub> /[P <sub>8</sub> H <sub>2</sub> O <sub>3</sub> ]    | 1.4%                                              |
| [P <sub>7</sub> H <sub>2</sub> O <sub>2</sub> +Na]/[P <sub>7</sub> O <sub>2</sub> +Na]                               | 0.7%                                              | P <sub>8</sub> /[P <sub>9</sub> HO <sub>3</sub> ]                  | 4.5%                                              |
| [P <sub>9</sub> HO <sub>3</sub> ]/[P <sub>9</sub> HO <sub>2</sub> ]                                                  | 10.6%                                             | P <sub>9</sub> /[P <sub>10</sub> H <sub>2</sub> O <sub>3</sub> ]   | 5.6%                                              |
| P <sub>8</sub> /[P <sub>9</sub> HO <sub>2</sub> ]                                                                    | 7.2%                                              | P <sub>10</sub> /[P <sub>11</sub> H <sub>2</sub> O <sub>3</sub> ]  | 1.6%                                              |
| [P <sub>7</sub> N <sub>2</sub> +K]/P <sub>7</sub>                                                                    | 2.7%                                              | P <sub>11</sub> /[P <sub>12</sub> H <sub>2</sub> O <sub>3</sub> ]  | 5.6%                                              |
| [P <sub>7</sub> N <sub>2</sub> O <sub>2</sub> +Na]/[P <sub>7</sub> N <sub>2</sub> +K]                                | 4.5%                                              | P <sub>12</sub> /[P <sub>13</sub> H <sub>2</sub> O <sub>3</sub> ]  | 16.4%                                             |
| [P <sub>7</sub> H <sub>2</sub> N <sub>2</sub> O <sub>2</sub> +Na]/[P <sub>7</sub> N <sub>2</sub> +K]                 | 18.5%                                             |                                                                    |                                                   |
| [P <sub>7</sub> H <sub>2</sub> N <sub>2</sub> O <sub>2</sub> +Na]/[P <sub>7</sub> N <sub>2</sub> O <sub>2</sub> +Na] | 0.7%                                              |                                                                    |                                                   |
| [P <sub>7</sub> N <sub>2</sub> +K]/[P <sub>8</sub> N <sub>2</sub> O <sub>2</sub> +2Na]                               | 5.0%                                              |                                                                    |                                                   |

37 <sup>a</sup> The sample-to-sample RSDs were measured based on 15 samples in different batches ( $n =$   
 38 15).

39

40 **Table S6. Feature MS peaks and peak ratios in Fig. 2 used to deduce different degradation**  
 41 **pathways in Fig. 3.<sup>a</sup>**

|         |                                                                                                                                                                                                                                                                                                                                                                                                                                    |
|---------|------------------------------------------------------------------------------------------------------------------------------------------------------------------------------------------------------------------------------------------------------------------------------------------------------------------------------------------------------------------------------------------------------------------------------------|
| Route 1 | $[P_7H_2O_2+Na]/P_7$ , $P_8/[P_9HO_2]$ , $[PH_2O_2+Na]^+$ , $[P_7H_2O_2+Na]^+$ , $P_9HO_2^+$ , $P_{10}H_2O_2^+$                                                                                                                                                                                                                                                                                                                    |
| Route 2 | $[P_7O_2+Na]/P_7$ , $[P_7H_2O_2+Na]/[P_7O_2+Na]$ , $[PO_2+Na]^+$ , $P_4O_2^+$ , $[P_3H_4O_4+K]^+$ , $[P_7O_2+Na]^+$ , $[P_8O_2+2Na]^+$ , $P_9HO_2^+$ , $P_{23}O_2^+$                                                                                                                                                                                                                                                               |
| Route 3 | $[P_9HO_3]/[P_9HO_2]$ , $P_4/[P_5H_2O_3+Na]$ , $P_7/[P_8H_2O_3]$ , $P_8/[P_9HO_3]$ , $P_9/[P_{10}H_2O_3]$ , $P_{10}/[P_{11}H_2O_3]$ , $P_{11}/[P_{12}H_2O_3]$ , $P_{12}/[P_{13}H_2O_3]$ , $[P_2HO_2+Na]^+$ , $[PH_2O_3+Na]^+$ , $P_2H_2O_3^+$ , $[P_5H_2O_3+Na]^+$ , $[P_5H_2O_3+Na]^+$ , $[P_6HO_2+Na]^+$ , $P_8H_2O_3^+$ , $P_9HO_2^+$ , $P_9HO_3^+$ , $P_{10}H_2O_3^+$ , $P_{11}H_2O_3^+$ , $P_{12}H_2O_3^+$ , $P_{13}H_2O_3^+$ |
| Route 4 | $[P_7N_2+K]/P_7$ , $P_9N_4^+$ , $P_{10}N_2^+$ , $P_{18}N_2^+$ , $[P_7N_2+K]^+$ , $[P_9N_2+2Na]^+$ , $[P_{14}N_2+Na]^+$ , $[P_{15}N_2+Na]^+$ , $[P_{16}N_2+Na]^+$ , $[P_{18}N_2+Na]^+$ , $[P_{22}N_2+Na]^+$ , $P_2H_4N_2O_4^+$ , $[P_7H_2N_2O_2+Na]^+$                                                                                                                                                                              |
| Route 5 | $[P_7N_2+K]/P_7$ , $[P_7H_2N_2O_2+Na]/[P_7N_2+K]$ , $[P_7H_2N_2O_2+Na]/[P_7N_2O_2+Na]$ , $P_9N_4^+$ , $P_{10}N_2^+$ , $P_{18}N_2^+$ , $[P_7N_2+K]^+$ , $[P_9N_2+2Na]^+$ , $[P_{14}N_2+Na]^+$ , $[P_{15}N_2+Na]^+$ , $[P_{16}N_2+Na]^+$ , $[P_{18}N_2+Na]^+$ , $[P_{22}N_2+Na]^+$ , $[P_6HN_2O_2+Na]^+$                                                                                                                             |
| Route 6 | $[P_7N_2+K]/P_7$ , $[P_7N_2O_2+Na]/[P_7N_2+K]$ , $[P_7N_2+K]/[P_8N_2O_2+2Na]$ , $P_9N_4^+$ , $P_{10}N_2^+$ , $P_{18}N_2^+$ , $[P_7N_2+K]^+$ , $[P_9N_2+2Na]^+$ , $[P_{14}N_2+Na]^+$ , $[P_{15}N_2+Na]^+$ , $[P_{16}N_2+Na]^+$ , $[P_{18}N_2+Na]^+$ , $[P_{22}N_2+Na]^+$ , $[PN_2O_2+K]^+$ , $P_5N_2O_2^+$ , $P_5N_4O_4^+$ , $[P_5N_2O_2+K]^+$ , $[P_7N_2O_2+Na]^+$ , $[P_8N_2O_2+2Na]^+$                                           |

42 <sup>a</sup> Here the MS signals are described in two different ways (i.e., peaks and peak ratios). The  
 43 fingerprint peaks were used to identify key intermediates and products, and the peak ratios of  
 44 the adjacent fingerprint peaks were mainly used to deduce the degradation pathways.

45

46 **Table S7. Feature MS peaks by high-resolution LDI-FTICR MS verifying the different**  
 47 **degradation pathways in Fig. 3.**

|         |                                                                                                                                                                                                                                                                                                                                                                                                                                                                                                                                                                                                                                                                                                                                                                                                                                               |
|---------|-----------------------------------------------------------------------------------------------------------------------------------------------------------------------------------------------------------------------------------------------------------------------------------------------------------------------------------------------------------------------------------------------------------------------------------------------------------------------------------------------------------------------------------------------------------------------------------------------------------------------------------------------------------------------------------------------------------------------------------------------------------------------------------------------------------------------------------------------|
| Route 1 | $P_{10}HO_2^+$ (342.7348, 0.15 ppm), $P_9H_2O_2^-$ (312.7687, -0.16 ppm), $P_2H_2O_2^+$ (95.9525, 0.11 ppm), $P_{11}H_2O_2^+$ (374.7163, 0.10 ppm), $P_{19}H_2O_2^+$ (622.5063, 0.16 ppm), $[P_{17}H_3O_2+K-2H]^-$ (598.5149, 0.20 ppm), $P_8HO_3^-$ (296.7821, -0.18 ppm), $P_{10}H_3O_3^-$ (360.7453, -0.06 ppm), $P_{11}H_2O_3^-$ (390.7112, -0.04 ppm), $P_4H_2O_3^+$ (173.8949, -0.13 ppm), $P_{11}H_2O_3^+$ (390.7113, 0.07 ppm), $P_{12}H_2O_3^+$ (421.6849, -0.20 ppm), $P_{13}H_3O_3^+$ (453.6667, 0.18 ppm)                                                                                                                                                                                                                                                                                                                         |
| Route 2 | $P_9O_2^-$ (310.7532, 0.17 ppm), $P_{11}O_2^+$ (372.7006, -0.16 ppm), $P_{15}O_2^-$ (496.5958, 0.19 ppm), $P_{19}O_2^+$ (620.4906, -0.17 ppm), $P_6O^-$ (201.8369, -0.20 ppm), $P_{11}O^+$ (356.7058, 0.18 ppm), $P_{13}O^-$ (418.6534, 0.20 ppm), $P_{20}O^+$ (635.4697, 0.19 ppm), $P_{12}HO^-$ (388.6874, 0.13 ppm), $P_{10}HO_2^+$ (342.7348, 0.15 ppm), $P_2H_2O_2^+$ (95.9525, 0.11 ppm), $P_9H_2O_2^-$ (312.7687, -0.16 ppm), $P_{11}H_2O_2^+$ (374.7163, 0.10 ppm), $P_{19}H_2O_2^+$ (622.5063, 0.16 ppm), $[P_{17}H_3O_2+K-2H]^-$ (598.5149, 0.20 ppm), $P_8HO_3^-$ (296.7821, -0.18 ppm), $P_{10}H_3O_3^-$ (360.7453, -0.06 ppm), $P_{11}H_2O_3^-$ (390.7112, -0.04 ppm), $P_4H_2O_3^+$ (173.8949, -0.13 ppm), $P_{11}H_2O_3^+$ (390.7113, 0.07 ppm), $P_{12}H_2O_3^+$ (421.6849, -0.20 ppm), $P_{13}H_3O_3^+$ (453.6667, 0.18 ppm) |
| Route 3 | $P_9O_2^-$ (310.7532, 0.17 ppm), $P_{11}O_2^+$ (372.7006, -0.16 ppm), $P_{15}O_2^-$ (496.5958, 0.19 ppm), $P_{19}O_2^+$ (620.4906, -0.17 ppm), $P_{10}HO_2^+$ (342.7348, 0.15 ppm), $P_8HO_3^-$ (296.7821, -0.18 ppm), $P_{10}H_3O_3^-$ (360.7453, -0.06 ppm), $P_{11}H_2O_3^-$ (390.7112, -0.04 ppm), $P_4H_2O_3^+$ (173.8949, -0.13 ppm), $P_{11}H_2O_3^+$ (390.7113, 0.07 ppm), $P_{12}H_2O_3^+$ (421.6849, -0.20 ppm), $P_{13}H_3O_3^+$ (453.6667, 0.18 ppm), $P_8H_3O_4^-$ (314.7926, -0.10 ppm), $[P_{24}H_4O_4+Na-2H]^-$ (832.3547, -0.07 ppm)                                                                                                                                                                                                                                                                                         |
| Route 4 | $[P_{21}N_2+K]^+$ (717.4184, 0.14 ppm), $[P_{21}N_2+2Na]^+$ (724.4342, 0.09 ppm), $[P_8H_2N_2+Na-2H]^-$ (329.7593, 0.09 ppm), $[P_5N_2+Na]^+$ (205.8641, -0.14 ppm), $P_{25}N_2O_2^-$ (834.3393, -0.20 ppm), $[P_3N_2O_2+K]^+$ (191.8804, -0.16 ppm), $[P_7N_2O_2+2Na]^+$ (322.7915, 0.62 ppm), $[P_{10}N_2O_2+Na]^+$ (392.7229, 0.14 ppm), $[P_{11}N_2O_2+Na]^+$ (423.6965, -0.10 ppm), $P_5HN_2O_2^+$ (215.8720, -0.14 ppm), $P_{16}HN_2O_2^+$ (556.5836, 0.20 ppm), $[P_4HN_2O_2+Na]^+$ (207.8880, -                                                                                                                                                                                                                                                                                                                                       |

---

0.14 ppm), [P<sub>14</sub>H<sub>2</sub>N<sub>2</sub>O<sub>2</sub>+K-2H]<sup>-</sup> (532.5917, -0.11 ppm), [P<sub>16</sub>H<sub>2</sub>N<sub>2</sub>O<sub>2</sub>+K-2H]<sup>-</sup> (594.5393, 0.03 ppm), [P<sub>20</sub>HN<sub>2</sub>O<sub>2</sub>+K]<sup>+</sup> (719.4420, -0.20 ppm), [P<sub>7</sub>H<sub>2</sub>N<sub>2</sub>O<sub>2</sub>+Na]<sup>+</sup> (301.8171, -0.10 ppm), [P<sub>7</sub>H<sub>3</sub>N<sub>2</sub>O<sub>2</sub>+K-2H]<sup>-</sup> (316.7833, 0.14 ppm), [P<sub>9</sub>H<sub>3</sub>N<sub>2</sub>O<sub>2</sub>+Na-2H]<sup>-</sup> (362.7568, -0.09 ppm), P<sub>9</sub>N<sub>2</sub>O<sub>3</sub><sup>+</sup> (354.754, -0.15 ppm), P<sub>11</sub>N<sub>2</sub>O<sub>3</sub><sup>-</sup> (416.7018, 0.19 ppm), P<sub>15</sub>N<sub>2</sub>O<sub>3</sub><sup>+</sup> (540.5967, -0.13 ppm), P<sub>9</sub>H<sub>2</sub>N<sub>2</sub>O<sub>3</sub><sup>-</sup> (356.7699, 0.06 ppm)

---

Route 5 [P<sub>21</sub>N<sub>2</sub>+K]<sup>+</sup> (717.4184, 0.14 ppm), [P<sub>21</sub>N<sub>2</sub>+2Na]<sup>+</sup> (724.4342, 0.09 ppm), [P<sub>8</sub>H<sub>2</sub>N<sub>2</sub>+Na-2H]<sup>-</sup> (329.7593, 0.09 ppm), [P<sub>5</sub>N<sub>2</sub>+Na]<sup>+</sup> (205.8641, -0.14 ppm), P<sub>25</sub>N<sub>2</sub>O<sub>2</sub><sup>-</sup> (834.3393, -0.20 ppm), [P<sub>3</sub>N<sub>2</sub>O<sub>2</sub>+K]<sup>+</sup> (191.8804, -0.16 ppm), [P<sub>7</sub>N<sub>2</sub>O<sub>2</sub>+2Na]<sup>+</sup> (322.7915, 0.62 ppm), [P<sub>10</sub>N<sub>2</sub>O<sub>2</sub>+Na]<sup>+</sup> (392.7229, 0.14 ppm), [P<sub>11</sub>N<sub>2</sub>O<sub>2</sub>+Na]<sup>+</sup> (423.6965, -0.10 ppm), P<sub>5</sub>HN<sub>2</sub>O<sub>2</sub><sup>+</sup> (215.8720, -0.14 ppm), P<sub>16</sub>HN<sub>2</sub>O<sub>2</sub><sup>+</sup> (556.5836, 0.20 ppm), [P<sub>4</sub>HN<sub>2</sub>O<sub>2</sub>+Na]<sup>+</sup> (207.8880, -0.14 ppm), [P<sub>14</sub>H<sub>2</sub>N<sub>2</sub>O<sub>2</sub>+K-2H]<sup>-</sup> (532.5917, -0.11 ppm), [P<sub>16</sub>H<sub>2</sub>N<sub>2</sub>O<sub>2</sub>+K-2H]<sup>-</sup> (594.5393, 0.03 ppm), [P<sub>20</sub>HN<sub>2</sub>O<sub>2</sub>+K]<sup>+</sup> (719.4420, -0.20 ppm), [P<sub>7</sub>H<sub>2</sub>N<sub>2</sub>O<sub>2</sub>+Na]<sup>+</sup> (301.8171, -0.10 ppm), [P<sub>9</sub>H<sub>3</sub>N<sub>2</sub>O<sub>2</sub>+Na-2H]<sup>-</sup> (362.7568, -0.09 ppm), [P<sub>7</sub>H<sub>3</sub>N<sub>2</sub>O<sub>2</sub>+K-2H]<sup>-</sup> (316.7833, 0.14 ppm), P<sub>9</sub>N<sub>2</sub>O<sub>3</sub><sup>+</sup> (354.754, -0.15 ppm), P<sub>11</sub>N<sub>2</sub>O<sub>3</sub><sup>-</sup> (416.7018, 0.19 ppm), P<sub>15</sub>N<sub>2</sub>O<sub>3</sub><sup>+</sup> (540.5967, -0.13 ppm), P<sub>9</sub>H<sub>2</sub>N<sub>2</sub>O<sub>3</sub><sup>-</sup> (356.7699, 0.06 ppm)

---

Route 6 [P<sub>5</sub>N<sub>2</sub>+Na]<sup>+</sup> (205.8641, -0.14 ppm), [P<sub>21</sub>N<sub>2</sub>+K]<sup>+</sup> (717.4184, 0.14 ppm), [P<sub>21</sub>N<sub>2</sub>+2Na]<sup>+</sup> (724.4342, 0.09 ppm), [P<sub>8</sub>H<sub>2</sub>N<sub>2</sub>+Na-2H]<sup>-</sup> (329.7593, 0.09 ppm), P<sub>25</sub>N<sub>2</sub>O<sub>2</sub><sup>-</sup> (834.3393, -0.20 ppm), [P<sub>3</sub>N<sub>2</sub>O<sub>2</sub>+K]<sup>+</sup> (191.8804, -0.16 ppm), [P<sub>7</sub>N<sub>2</sub>O<sub>2</sub>+2Na]<sup>+</sup> (322.7915, 0.62 ppm), [P<sub>10</sub>N<sub>2</sub>O<sub>2</sub>+Na]<sup>+</sup> (392.7229, 0.14 ppm), [P<sub>11</sub>N<sub>2</sub>O<sub>2</sub>+Na]<sup>+</sup> (423.6965, -0.10 ppm), P<sub>5</sub>HN<sub>2</sub>O<sub>2</sub><sup>+</sup> (215.8720, -0.14 ppm), P<sub>16</sub>HN<sub>2</sub>O<sub>2</sub><sup>+</sup> (556.5836, 0.20 ppm), [P<sub>4</sub>HN<sub>2</sub>O<sub>2</sub>+Na]<sup>+</sup> (207.8880, -0.14 ppm), [P<sub>7</sub>H<sub>2</sub>N<sub>2</sub>O<sub>2</sub>+Na]<sup>+</sup> (301.8171, -0.10 ppm), [P<sub>7</sub>H<sub>3</sub>N<sub>2</sub>O<sub>2</sub>+K-2H]<sup>-</sup> (316.7833, 0.14 ppm), [P<sub>9</sub>H<sub>3</sub>N<sub>2</sub>O<sub>2</sub>+Na-2H]<sup>-</sup> (362.7568, -0.09 ppm), [P<sub>14</sub>H<sub>2</sub>N<sub>2</sub>O<sub>2</sub>+K-2H]<sup>-</sup> (532.5917, -0.11 ppm), [P<sub>16</sub>H<sub>2</sub>N<sub>2</sub>O<sub>2</sub>+K-2H]<sup>-</sup> (594.5393, 0.03 ppm), [P<sub>20</sub>HN<sub>2</sub>O<sub>2</sub>+K]<sup>+</sup> (719.4420, -0.20 ppm)

---

49 **Table S8. Detailed parameters of DFT and molecular dynamic model in Fig. S13.**

|                  | total/eV | P/eV    | N <sub>2</sub> /eV | E_abs/eV |
|------------------|----------|---------|--------------------|----------|
| P-N <sub>2</sub> | -209.70  | -193.09 | -16.95             | 0.33     |

50

51 **3. Supplementary Figures**

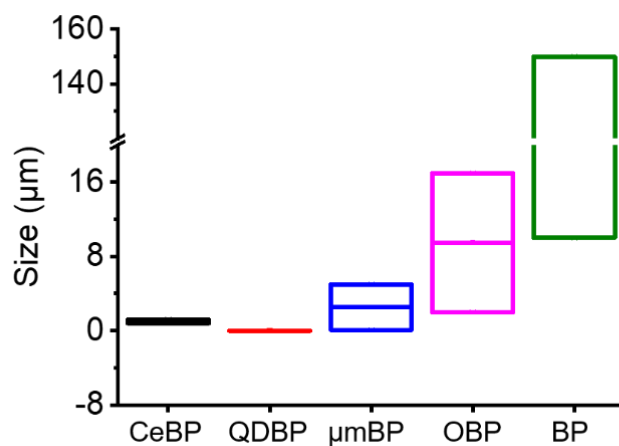

52

53 **Figure S1. Rough estimate of particle size of the BP materials used in this study.** The  
54 particle size was in the order of BP > OBP > μmBP > CeBP > QDBP.

55

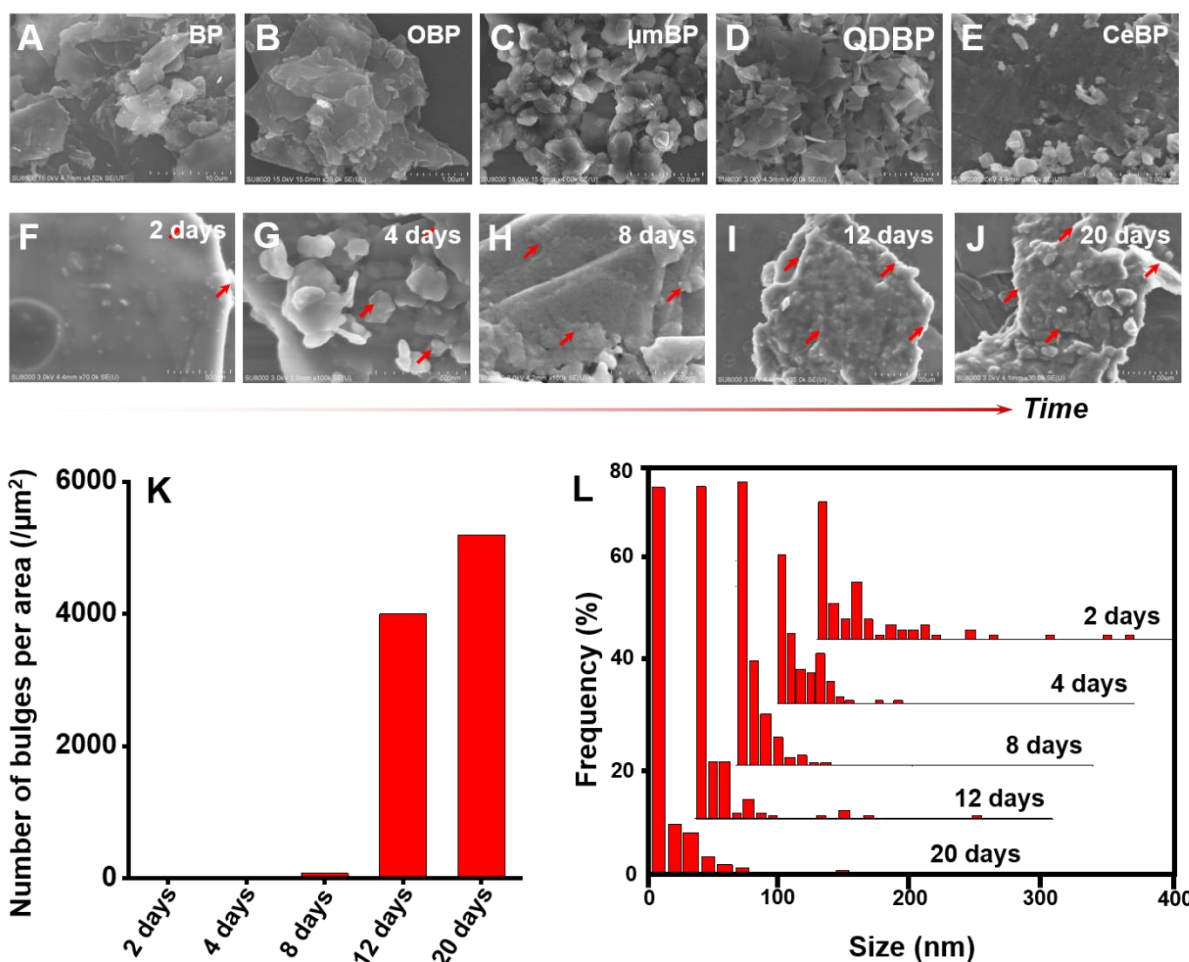

56  
 57 **Figure S2. Typical SEM images showing the morphology of different BP materials and**  
 58 **the morphological change during its degradation process. A-E, Typical SEM images of BP**  
 59 **(A), OBP (B),  $\mu$ mBP (C), QDBP (D), and CeBP (E). F-J, Morphological change of BP during**  
 60 **the degradation process up to 20 days. Time: F) 2 d, G) 4 d, H) 8 d, I) 12 d, and J) 20 d. K)**  
 61 **The number of bulges per area observed on the surface of BP sheets (per  $\mu\text{m}^2$  of BP surface).**  
 62 **L) The statistic histogram of the relative frequency of bulges of different sizes. The statistic**  
 63 **analysis of the SEM images was performed with the Image-Pro Plus software and 20 sample**  
 64 **spots. It can be observed that with prolonging the incubation time, the number of bulges on the**  
 65 **BP sheets increased obviously, and more small bulges with size less than 50 nm appeared.**  
 66 **Similar phenomenon has also been observed previously.<sup>1</sup>**

67



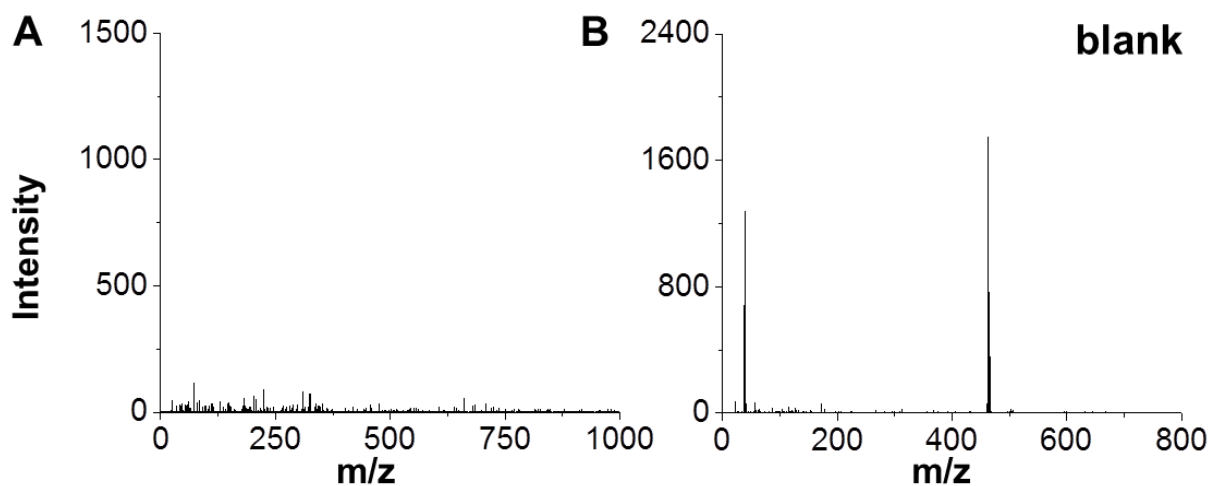

68

69 **Figure S3. Mass spectra of blank samples in LDI-TOF MS.** The left and right columns  
70 represent the spectra obtained in negative (A) and positive ion mode (B), respectively. It can  
71 be seen that the blank samples had no mass spectra signals corresponding to BP.

72

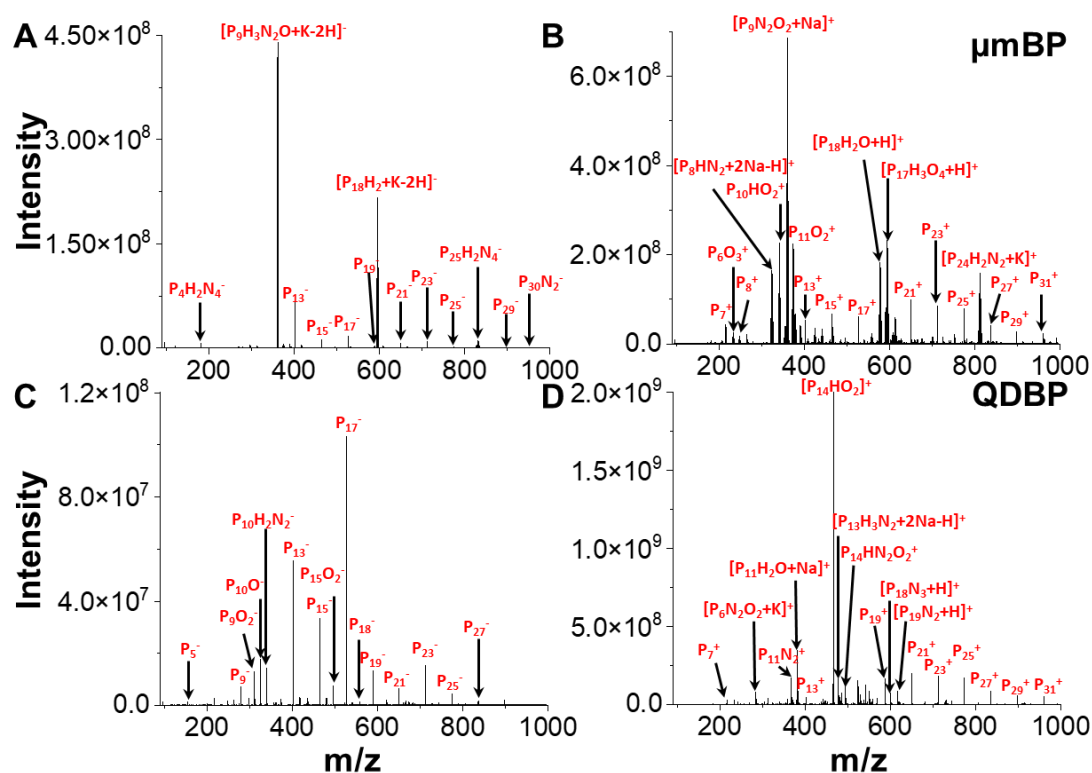

73

74 **Figure S4. Mass spectra of  $\mu$ BP and QDBP by dual-ion-mode LDI-FTICR MS. (A, B)**  
 75  $\mu$ BP, and (C, D) QDBP. The left and right columns represent the spectra obtained in negative  
 76 and positive ion mode, respectively. Analyte concentration: 100  $\mu$ g/mL. The mass spectra  
 77 verified that the chemical functionalization of BP affected the MS fingerprints. For each  
 78 spectrum, 20 shots were made in different sample regions and the spectrum with average  
 79 intensities is shown to ensure the representativeness.

80

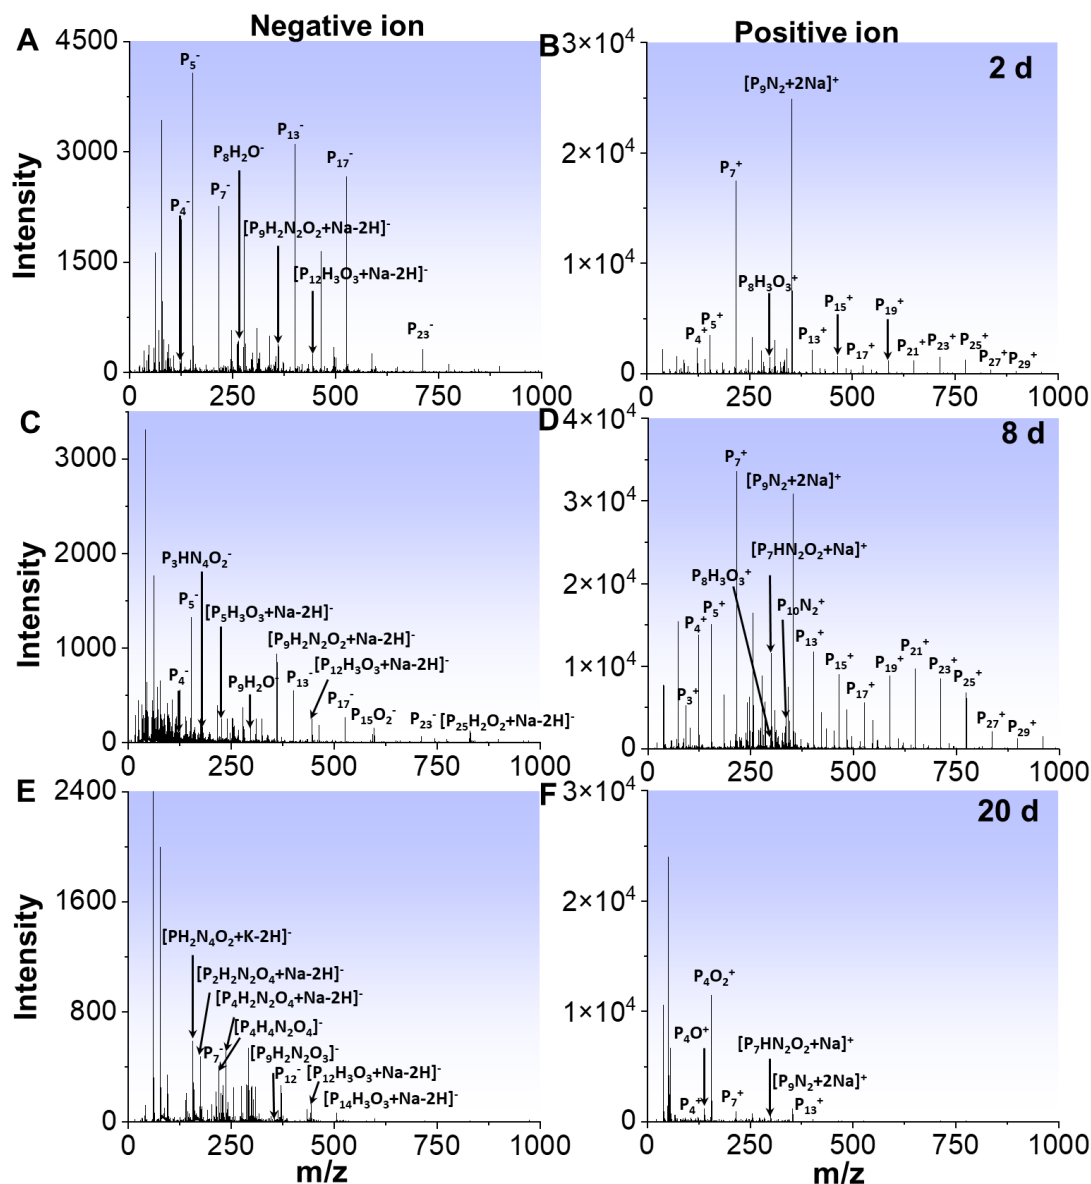

81

82 **Figure S5. Monitoring the ambient stability of untreated BP by dual-ion-mode LDI-TOF**  
 83 **MS. (A, B) 2 days, (C, D) 8 days, and (E, F) 20 days. The left and right columns represent the**  
 84 **spectra obtained in the negative and positive ion mode, respectively. A variety of peaks of**  
 85 **oxidized and nitrated products were yielded in the spectra with the peak intensities varying**  
 86 **with the degradation time. For each spectrum, 20 shots were made in different sample regions**  
 87 **and the spectrum with average intensities is shown to ensure the representativeness.**

88



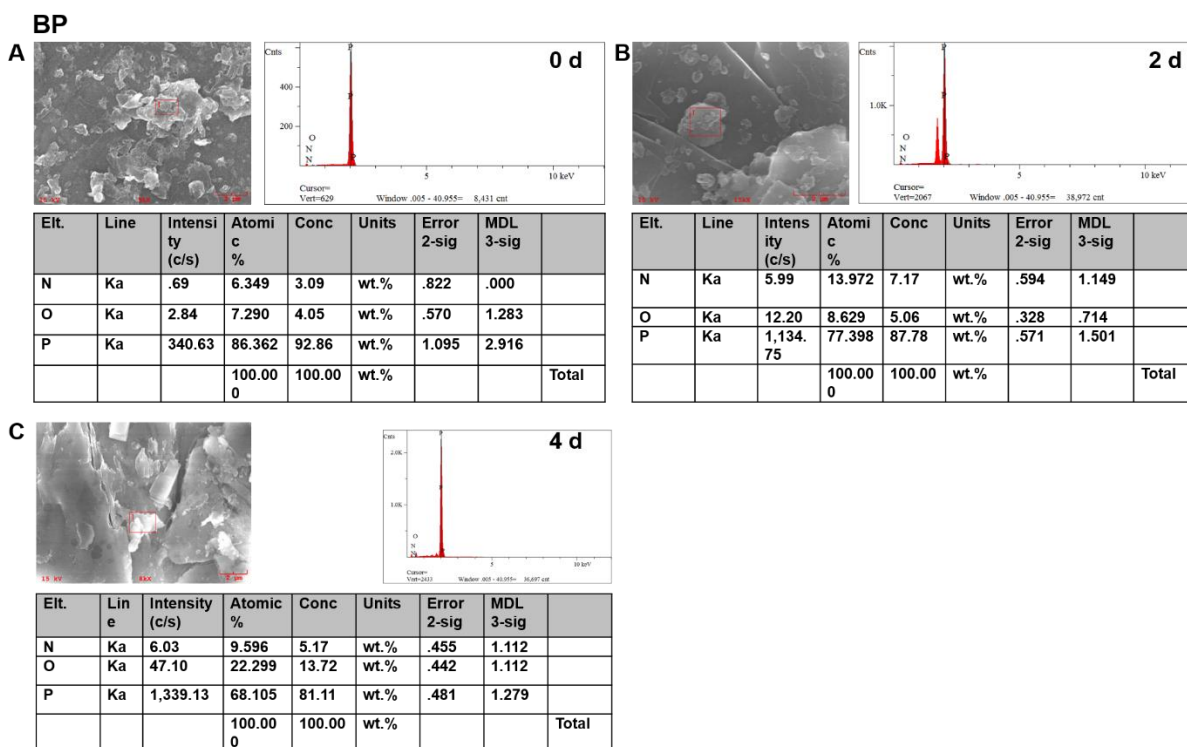

98  
99  
100  
101  
102  
103  
104  
105  
106

**Figure S7. EDX characterization of BP treated at different temperatures in air.** The EDX patterns of BP were obtained at the highlighted sections in the SEM images and the elemental analysis results are also given. Incubation time: **A**) without incubation, **B**) 2 d, and **C**) 4 d. It can be seen that the atomic percentage of O in BP gradually increased, indicating the increasing generation of oxidized intermediates/products; meanwhile, the ratio of the atomic percentage of N to O increased first and then decreased, which probably resulted from the generation of nitride intermediates and then their detachment from the BP surface.

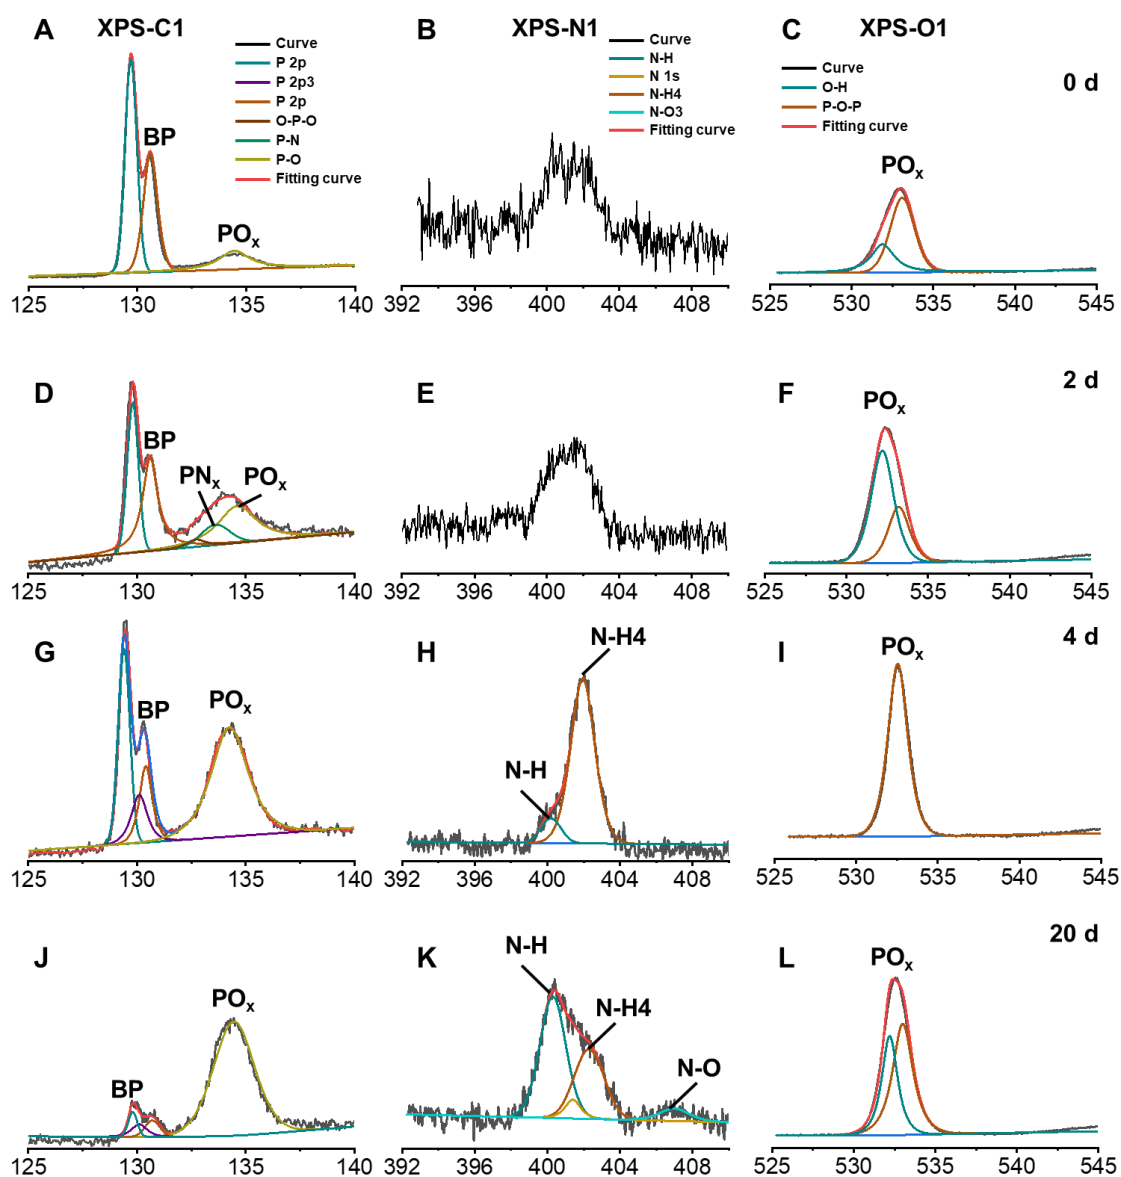

107

108 **Figure S8.** C1s, N1s, and O1s XPS spectra of BP in air over time. (A, D, G, J) C1s XPS  
 109 spectra, (B, E, H, K) N1s XPS spectra, and (C, F, I, L) O1s XPS spectra. The incubation time  
 110 was (A-C) 0 d, (D-F) 2 d, (G-I) 4 d, and (J-L) 20 d. The peaks at 132.4, 134.6, 135.8, and  
 111 133.4 eV are assigned to O-P-O, P-O, P-O, and P-N bonds, respectively. It can be seen that the  
 112 P-N bond in BP gradually increased and then decreased with time, indicating the production of  
 113 N-containing intermediates and their further dissociation from the BP surface. After  
 114 degradation, the N1 XPS spectra exhibited that the peaks of -N-H-, -N-N-, and -N-O- bonds  
 115 yielded, and the chemical bonds of -P-N-, -P=N-, -P-O-, and -P=O- appeared on the C1 XPS  
 116 spectra. These peaks verified the formation of the key oxidation and N<sub>2</sub>-addition oxidation  
 117 intermediate ions.

118

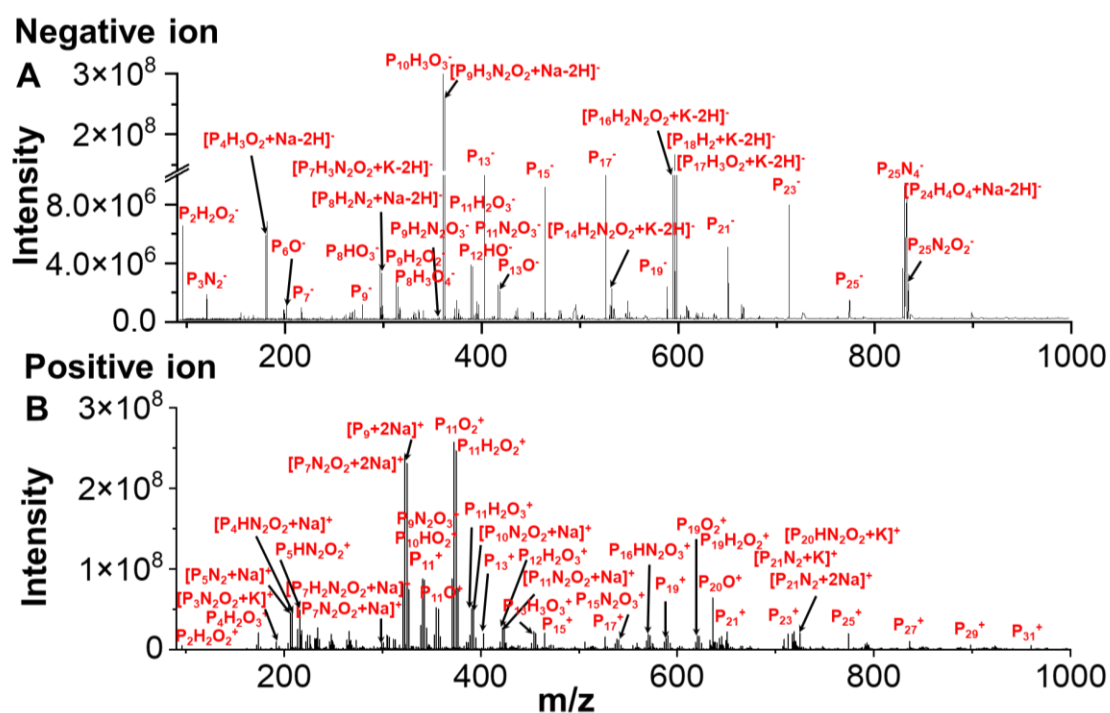

119  
 120 **Figure S9. Monitoring the ambient stability of untreated BP by dual-ion-mode LDI-**  
 121 **FTICR MS after degradation for 7 days.** A and B represent typical spectra obtained in the  
 122 negative and positive ion mode, respectively. After 7 days of degradation, a variety of peaks of  
 123 oxidized and nitrated products were yielded in the spectra. Due to the high resolution (Table  
 124 S3), the LDI-FTICR MS results well verified the results obtained by LDI-TOF MS. For each  
 125 spectrum, 20 shots were made in different sample regions and the spectrum with average  
 126 intensities is shown to ensure the representativeness.  
 127

Experiment value:  $402657(393.721)/48084908(392.723)=0.008$   
Theoretical value:  $0.8(393.723)/100(392.723)=0.008$

Experiment value:  $69(113.9)/9644(112.9)=0.007$   
Theoretical value:  $0.7(113.9)/100(112.9)=0.007$

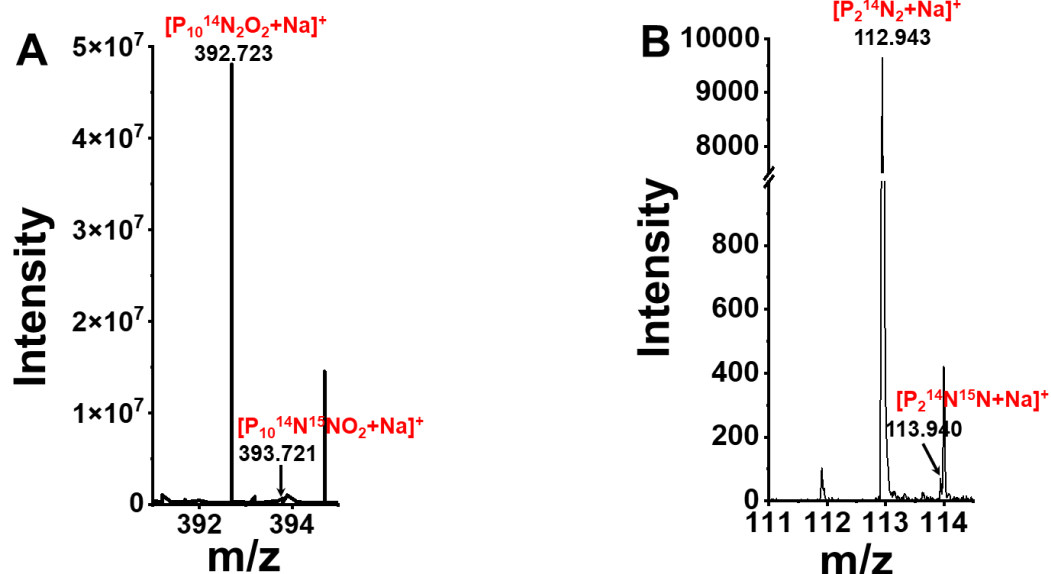

128

129 **Figure S10. The stable nitrogen isotope patterns verifying the nitrated products during**

130 **the BP degradation.** The left and right column show the peaks of two nitrated products

131 ( $[P_{10}N_2O_2+Na]$  and  $[P_2N_2+Na]$ ) in positive-ion LDI-FTICR MS. Nitrogen has two natural

132 stable isotopes ( $^{14}N$  and  $^{15}N$ ) with the abundance ratio of 99.634%:0.366%. The theoretical

133 value of the nitrogen isotope patterns for the nitrated products was calculated by the Compass

134 IsotopePattern Software (Bruker). It can be seen that the N isotope patterns could be observed

135 for the identified nitrated products ( $[P_{10}^{14}N^{15}NO_2+Na]^+$  and  $[P_2^{14}N^{15}N+Na]^+$ ), and the

136 experimental values of the nitrogen isotope patterns for the nitrated products were highly

137 consistent with the theoretical values, indicating that the identified products were accurate. It

138 is worth noting that due to the very low abundance of  $^{15}N$ , the N isotope patterns could only be

139 observed for a few nitrated products; despite that, the consistency of the N isotope patterns for

140 the nitrated products has strongly supported the reliability of the identification results.

141



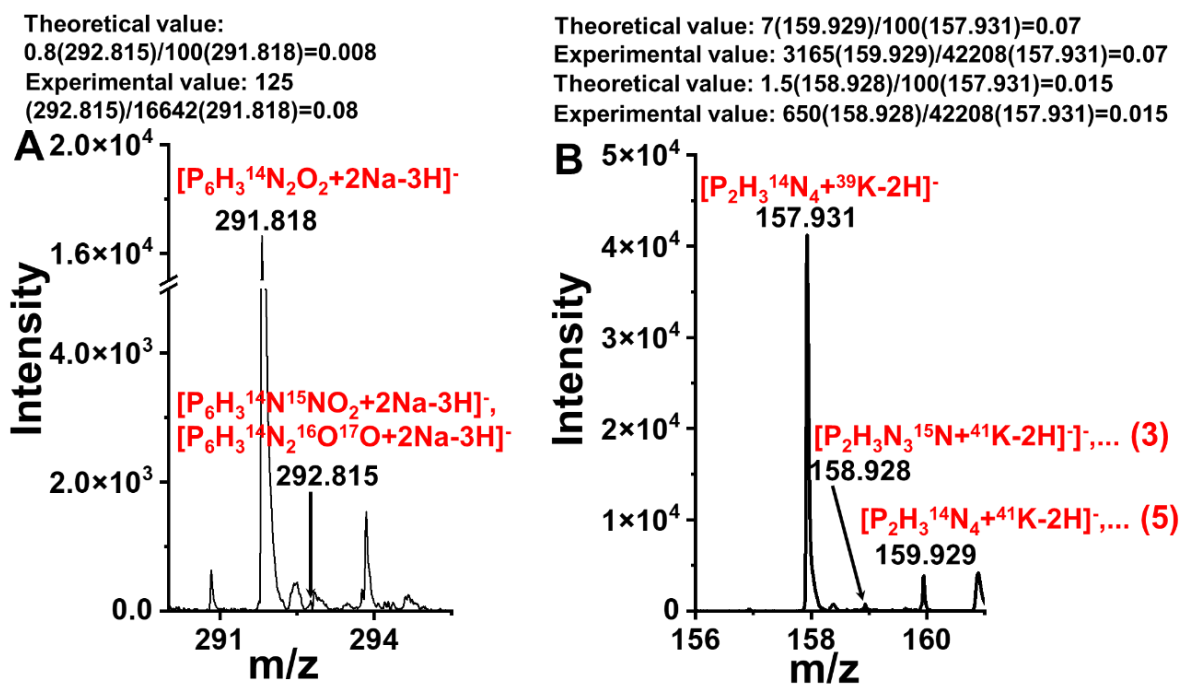

142  
 143

144 **Figure S11. The stable isotope patterns verifying the hydrogen-to-metal exchange**  
 145 **mechanism in negative-ion LDI-TOF MS.** The left and right column show the peaks of two  
 146 nitrated products ( $[P_6H_3N_2O_2+2Na-3H]^-$  and  $[P_2H_3N_4+K-2H]^-$ ) in LDI-TOF MS. N has two  
 147 natural stable isotopes ( $^{14}N$  and  $^{15}N$ ) with the abundance ratio of 99.634%:0.366%. K has three  
 148 natural stable isotopes ( $^{39}K$ ,  $^{40}K$ , and  $^{41}K$ ) with the abundance ratio of 93.3%: 0.0117%:6.7%.  
 149 The theoretical value of the K, N, and O isotope patterns for the nitrated products was  
 150 calculated by the Compass IsotopePattern Software (Bruker). It can be seen that the N, O and  
 151 K isotope patterns could be observed for the identified nitrated products ( $[P_6H_3N_2O_2+2Na-3H]^-$   
 152 and  $[P_2H_3N_4+K-2H]^-$ ), and the experimental values of the K, N, and O isotope patterns for the  
 153 nitrated products were highly consistent with the theoretical values, indicating that the  
 154 identified products through hydrogen-to-metal exchange mechanism were accurate.

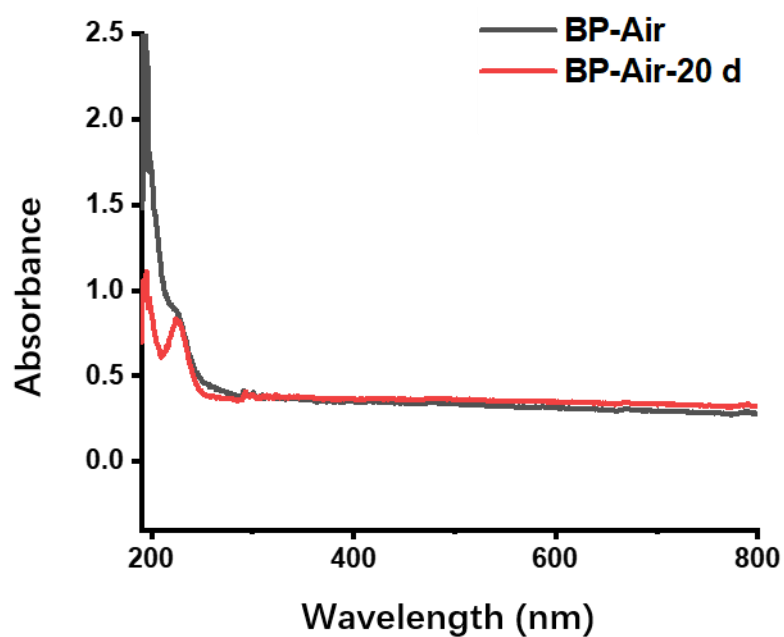

155

156 **Figure S12. UV-vis absorption of BP in air over time.** The spectra exhibited the absorption  
157 of BP at 355 nm (the wavelength used in the LDI process). After degradation for 20 d, the  
158 absorption of BP showed some redshift probably due to the generation of some chromophores  
159 (i.e., -P=O-).

160

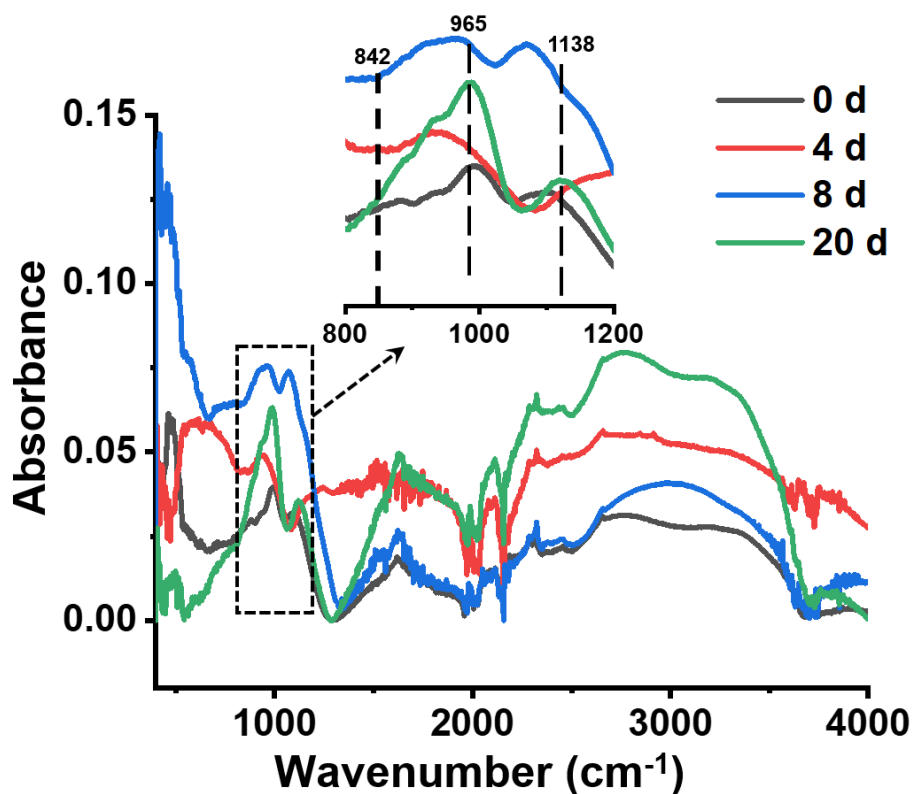

161

162 **Figure S13. FT-IR characterization of BP in air over time.** The 800 to 1200 cm<sup>-1</sup> region is  
 163 enlarged in the inset. The material exhibited absorption peaks at 1138 and 965 cm<sup>-1</sup>, which are  
 164 assigned to the -P=N- stretching vibration and the feature absorption of -P-O-P- stretch,  
 165 respectively. It can be observed that with the degradation processing, the oxygen/nitrogen-  
 166 containing functionalities showed a gradual increasing and then decreasing trend,  
 167 corresponding to the generation of O and N-containing intermediates and their further  
 168 degradation process.

169

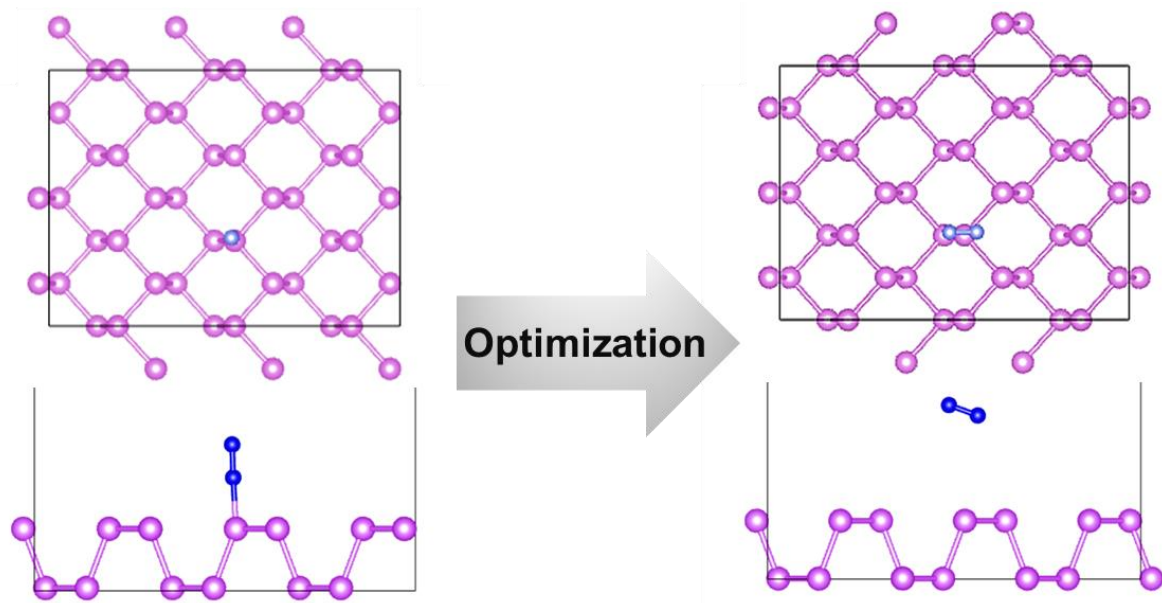

170

171 **Figure S14. DFT and molecular dynamics computations of the chemisorption of N<sub>2</sub> on BP**  
 172 **in the ambient environment.** Atomic structures of N<sub>2</sub> on pristine monolayer (1L) BP are  
 173 shown, and N<sub>2</sub> is individually adsorbed on the surface of 1L BP. N<sub>2</sub> interacts with the surface  
 174 of BP with an energy decrease of 0.33 eV, indicating that the chemisorption of N<sub>2</sub> on BP reduces  
 175 the energy barrier for the oxidation of BP and makes it relatively stable. The detailed parameters  
 176 of DFT molecular dynamic model are listed in **Table S8**.

177



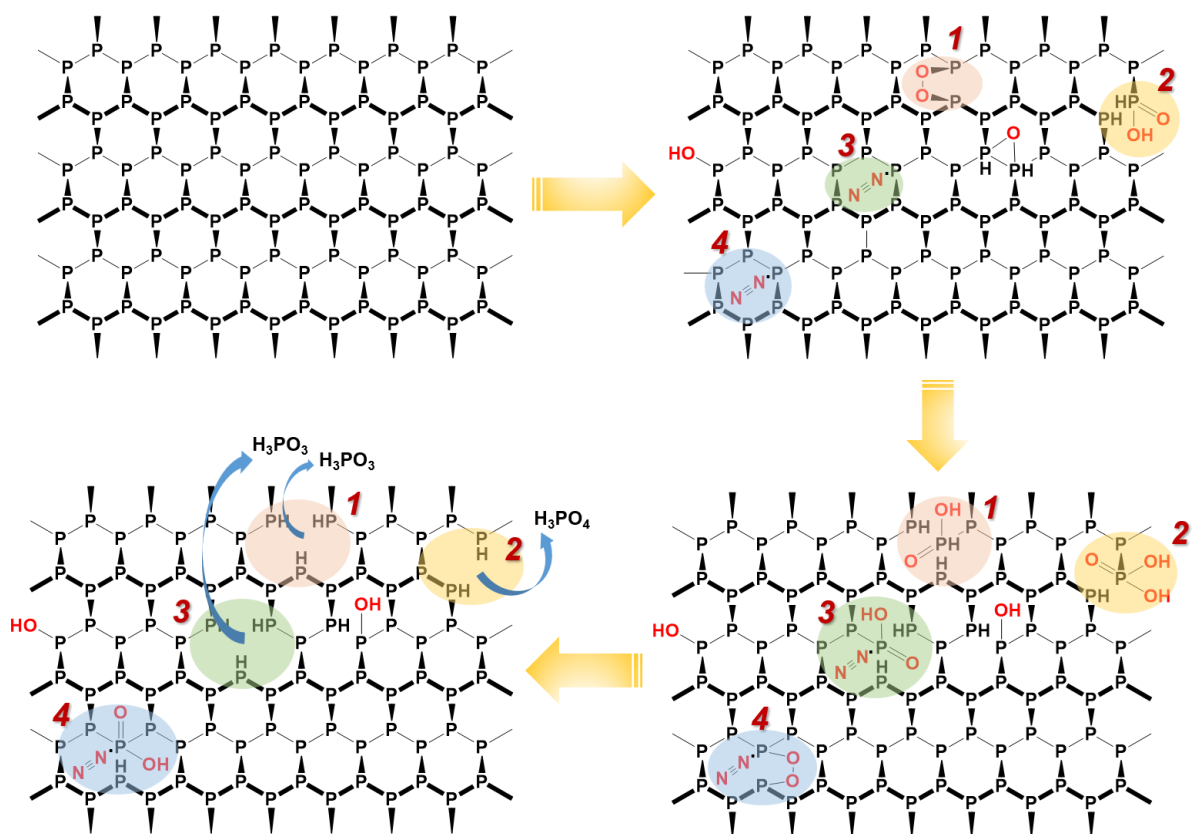

187

188 **Figure S16. Possible degradation pathways of CeBP in the ambient environment based**  
 189 **on LDI-MS fingerprinting results.** The colored shadows indicate different possible  
 190 degradation pathways (1-2: oxidation route; 3-4: N<sub>2</sub>-addition oxidation route). *Note:* this figure  
 191 only shows the pathways and intermediates derived from the MS fingerprints and may not  
 192 include all possible degradation pathways. Compared with BP, CeBP was more stable due to  
 193 the presence of Ce coating. From the LDI-MS fingerprinting, the proportion of N<sub>2</sub>-addition  
 194 oxidation to direct oxidation in CeBP was higher than BP.

195

196 **References for SI**

- 197 1. Ahmed, T.; Balendhran, S.; Karim, M. N.; Mayes, E. L. H.; Field, M. R.; Ramanathan, R.;  
198 Singh, M.; Bansal, V.; Sriram, S.; Bhaskaran, M.; Walia, S., *npj 2D Mater. Appl.*, **2017**, *1*,  
199 18.

200
